# Supplementary material
Source: Royal Society of Chemistry journal article supplement (doi:10.1039/d6nj00718j)
Supplement: d6nj00718j1.pdf [file d6nj00718j1.pdf]

Electronic Supplementary Information New Journal of Chemistry

for

## **Carborane isothiocyanates: synthesis, characterization and conjugation with *N*-nucleophiles**

Victoria M. Alpatova, Evgeny G. Rys, Alexander F. Smol'yakov, Elena G. Kononova and Valentina A. Ol'shevskaya\*

A.N.Nesmeyanov Institute of Organoelement Compounds, Russian Academy of Sciences,  
28 Bld. 1 Vavilov Street, 119334 Moscow, Russian Federation  
E-mail: [olshevsk@ineos.ac.ru](mailto:olshevsk@ineos.ac.ru)

### **Table of Contents**

|                                                                    |               |
|--------------------------------------------------------------------|---------------|
| <b>1 X-ray crystallography</b>                                     | <b>S2</b>     |
| <b>2 NMR spectra of carborane 7–11, 14, 15, 17, 19, 21, 24, 25</b> | <b>S3–S17</b> |

# 1. X-ray crystallography

Table S1. Crystal data and structure refinement for carboranes **7**, **10** and **25**.

|                                             | <b>7</b>                                                      | <b>10</b>                                                     | <b>25</b>                                                                      |
|---------------------------------------------|---------------------------------------------------------------|---------------------------------------------------------------|--------------------------------------------------------------------------------|
| Empirical formula                           | C <sub>3</sub> H <sub>11</sub> B <sub>10</sub> NS             | C <sub>5</sub> H <sub>15</sub> B <sub>10</sub> NS             | C <sub>9</sub> H <sub>24</sub> B <sub>10</sub> N <sub>2</sub> O <sub>3</sub> S |
| Formula weight                              | 201.29                                                        | 229.34                                                        | 348.46                                                                         |
| Temperature/K                               | 120                                                           | 120                                                           | 120                                                                            |
| Crystal system                              | orthorhombic                                                  | monoclinic                                                    | monoclinic                                                                     |
| Space group                                 | P2 <sub>1</sub> 2 <sub>1</sub> 2 <sub>1</sub>                 | P2/n                                                          | P2 <sub>1</sub>                                                                |
| a/Å                                         | 6.9714(4)                                                     | 15.4827(6)                                                    | 7.6763(3)                                                                      |
| b/Å                                         | 10.8737(7)                                                    | 7.5722(3)                                                     | 23.3782(9)                                                                     |
| c/Å                                         | 14.1939(8)                                                    | 21.8400(8)                                                    | 10.1930(4)                                                                     |
| α/°                                         | 90                                                            | 90                                                            | 90                                                                             |
| β/°                                         | 90                                                            | 94.311(2)                                                     | 92.084(2)                                                                      |
| γ/°                                         | 90                                                            | 90                                                            | 90                                                                             |
| Volume/Å <sup>3</sup>                       | 1075.97(11)                                                   | 2553.24(17)                                                   | 1828.01(12)                                                                    |
| Z                                           | 4                                                             | 8                                                             | 4                                                                              |
| ρ <sub>calc</sub> /cm <sup>3</sup>          | 1.243                                                         | 1.193                                                         | 1.266                                                                          |
| μ/mm <sup>-1</sup>                          | 0.245                                                         | 0.214                                                         | 0.187                                                                          |
| F(000)                                      | 408.0                                                         | 944.0                                                         | 728.0                                                                          |
| Crystal size/mm <sup>3</sup>                | 0.28 × 0.15 × 0.08                                            | 0.32 × 0.22 × 0.18                                            | 0.35 × 0.25 × 0.04                                                             |
| Radiation                                   | MoKα (λ = 0.71073)                                            | MoKα (λ = 0.71073)                                            | MoKα (λ = 0.71073)                                                             |
| 2θ range for data collection/°              | 4.718 to 56.634                                               | 3.346 to 51.996                                               | 3.998 to 51.996                                                                |
| Index ranges                                | -9 ≤ h ≤ 9, -13 ≤ k ≤ 14, -17 ≤ l ≤ 18                        | -19 ≤ h ≤ 19, -9 ≤ k ≤ 9, -26 ≤ l ≤ 26                        | -9 ≤ h ≤ 9, -28 ≤ k ≤ 28, -12 ≤ l ≤ 12                                         |
| Reflections collected                       | 12057                                                         | 34676                                                         | 26505                                                                          |
| Independent reflections                     | 2679 [R <sub>int</sub> = 0.0309, R <sub>sigma</sub> = 0.0307] | 5001 [R <sub>int</sub> = 0.0354, R <sub>sigma</sub> = 0.0295] | 7158 [R <sub>int</sub> = 0.0300, R <sub>sigma</sub> = 0.0353]                  |
| Data/restraints/parameters                  | 2679/0/136                                                    | 5001/0/311                                                    | 7158/1/459                                                                     |
| Goodness-of-fit on F <sup>2</sup>           | 1.080                                                         | 1.123                                                         | 1.067                                                                          |
| Final R indexes [I ≥ 2σ (I)]                | R <sub>1</sub> = 0.0291, wR <sub>2</sub> = 0.0780             | R <sub>1</sub> = 0.0380, wR <sub>2</sub> = 0.1175             | R <sub>1</sub> = 0.0365, wR <sub>2</sub> = 0.0946                              |
| Final R indexes [all data]                  | R <sub>1</sub> = 0.0315, wR <sub>2</sub> = 0.0789             | R <sub>1</sub> = 0.0561, wR <sub>2</sub> = 0.1248             | R <sub>1</sub> = 0.0408, wR <sub>2</sub> = 0.0964                              |
| Largest diff. peak/hole / e Å <sup>-3</sup> | 0.19/-0.26                                                    | 0.28/-0.27                                                    | 0.67/-0.26                                                                     |
| Flack parameter                             | 0.02(2)                                                       |                                                               | 0.011(18)                                                                      |

## 2. NMR spectra of carboranes 7–11, 14, 15, 17, 19, 21, 24, 25

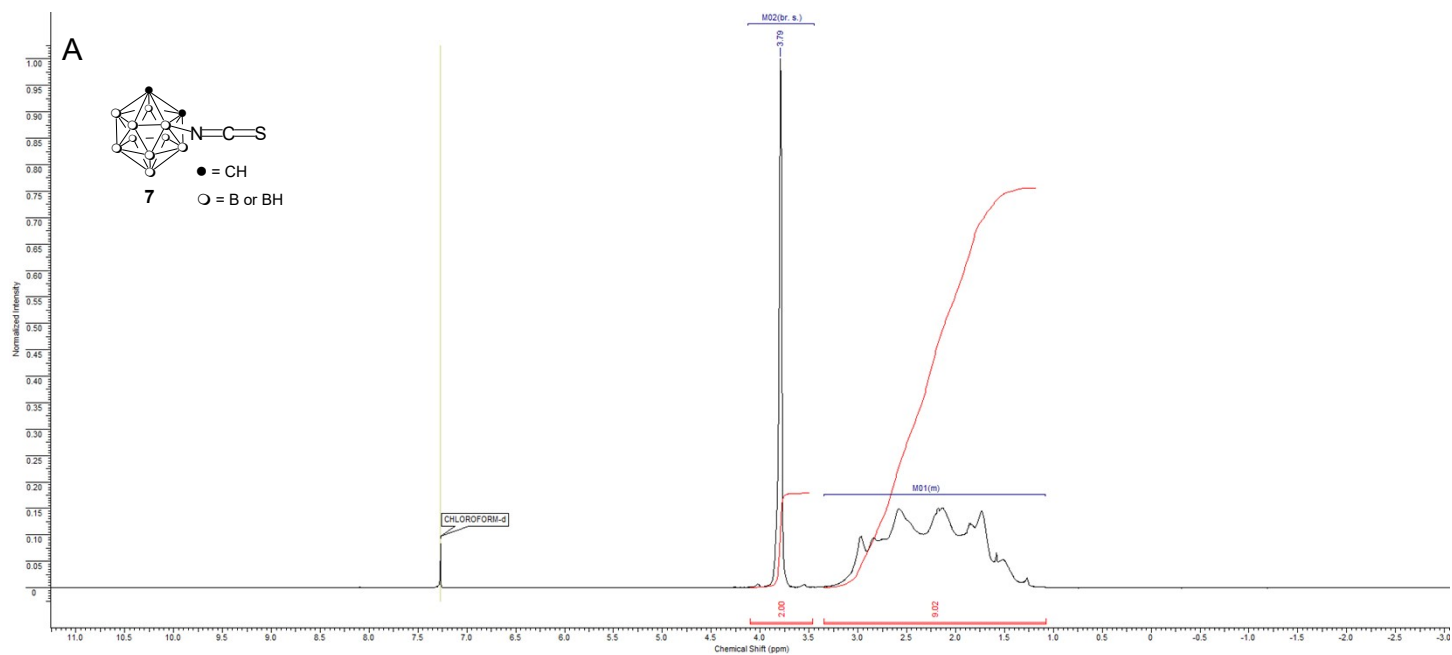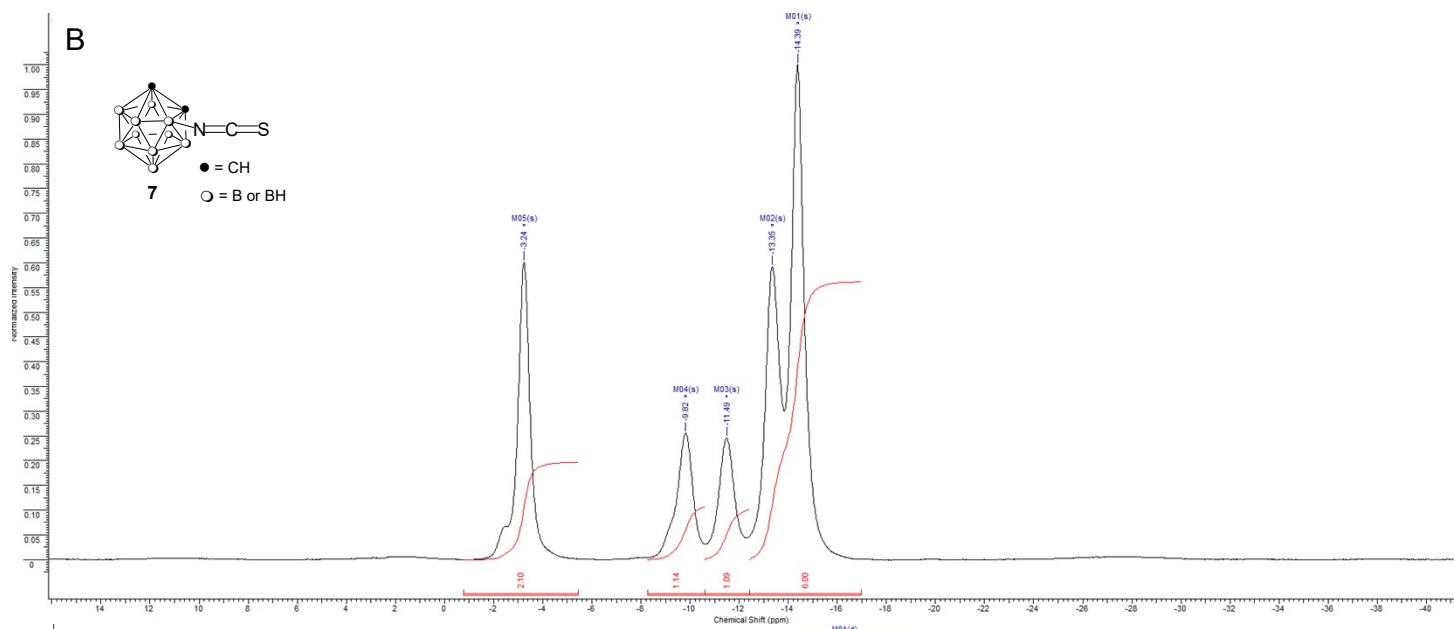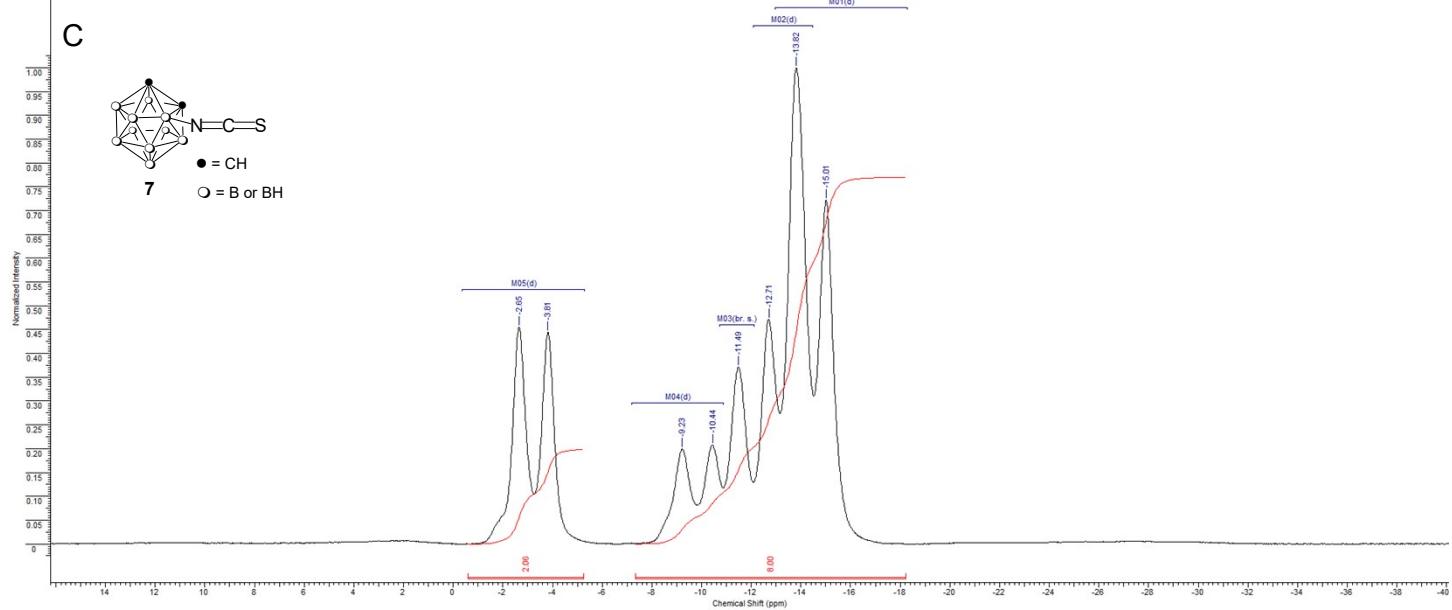

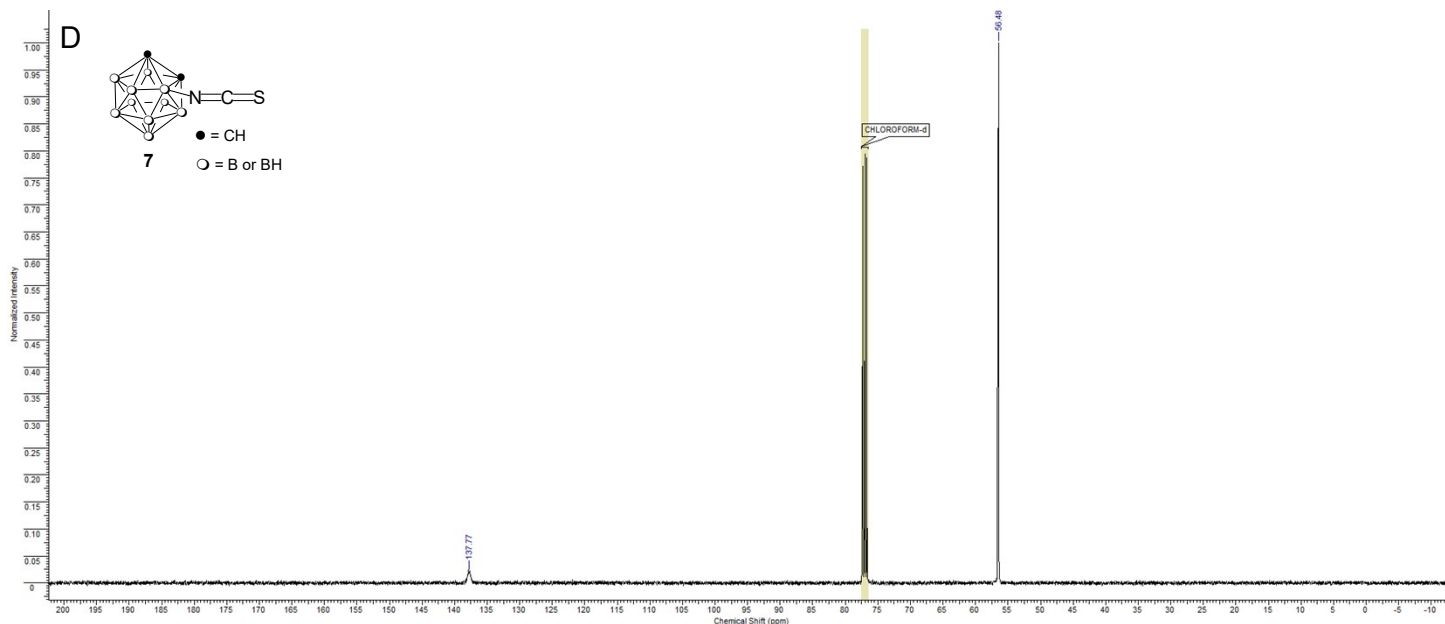

**Figure S1.** The  $^1\text{H}$  (A),  $^{11}\text{B}\{^1\text{H}\}$  (B),  $^{11}\text{B}$  (C), and  $^{13}\text{C}$  (D) spectra of 3-isothiocyanato-*o*-carborane (**7**) in  $\text{CDCl}_3$ .

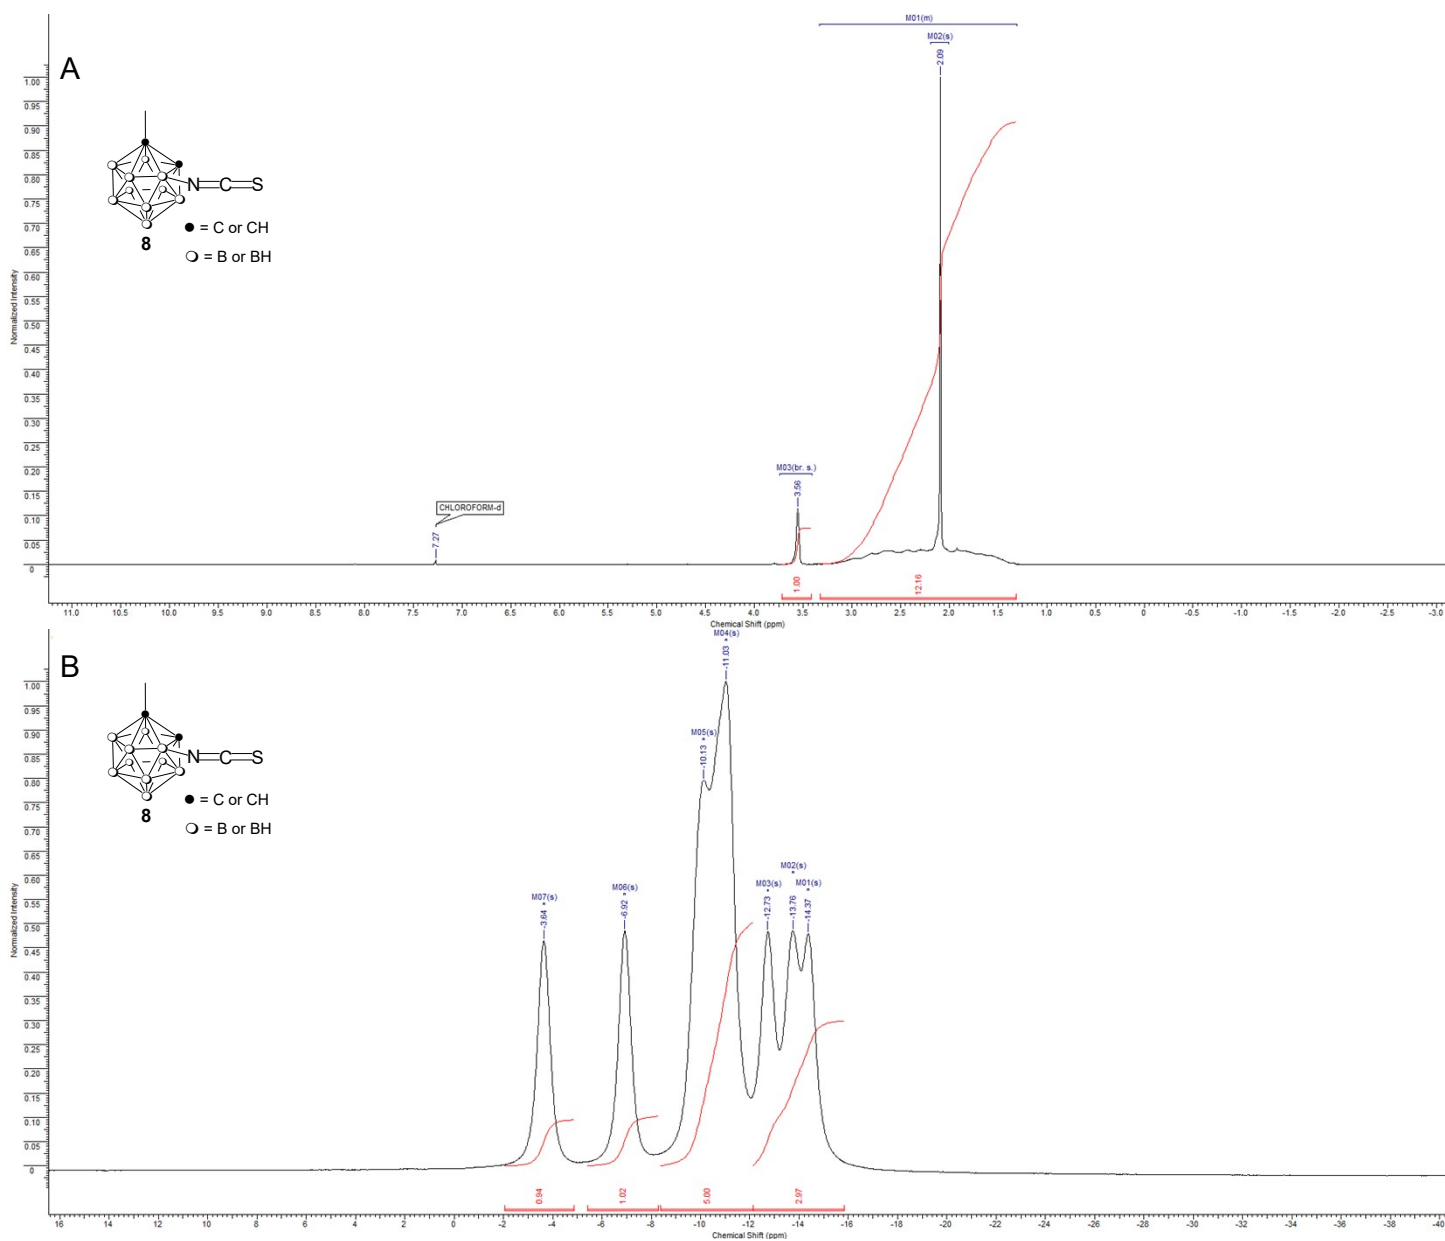

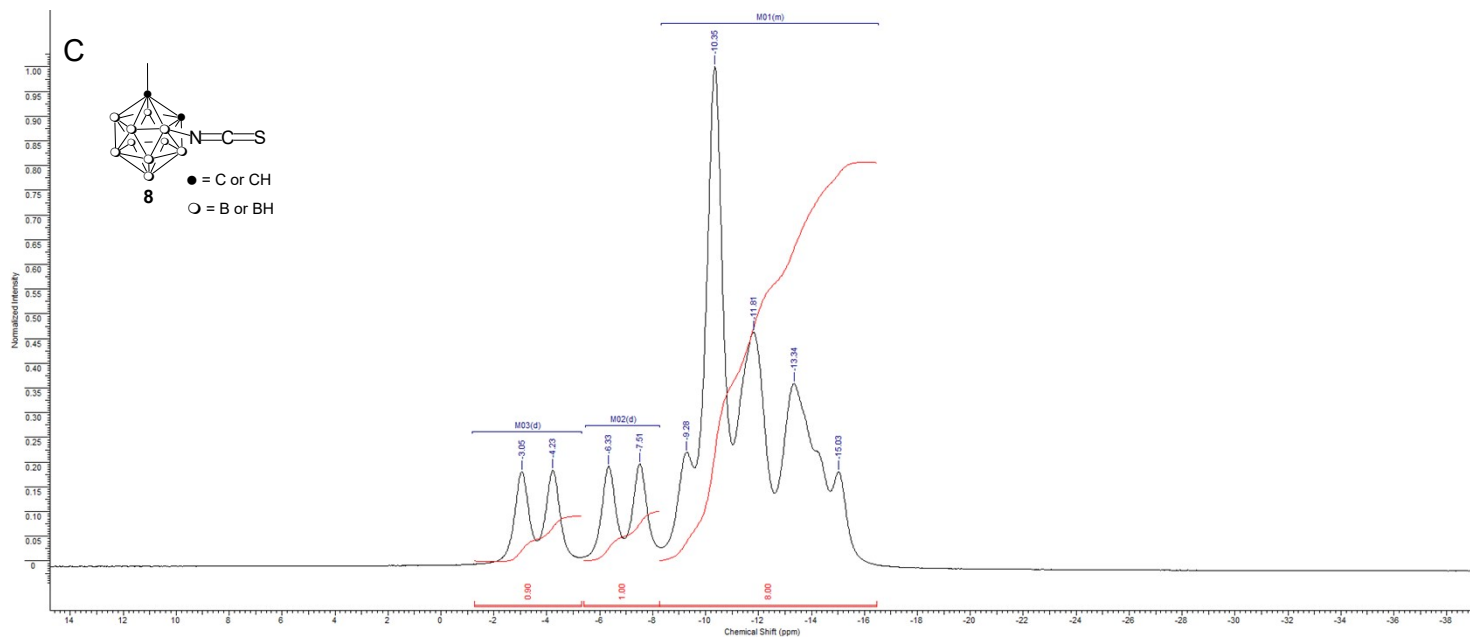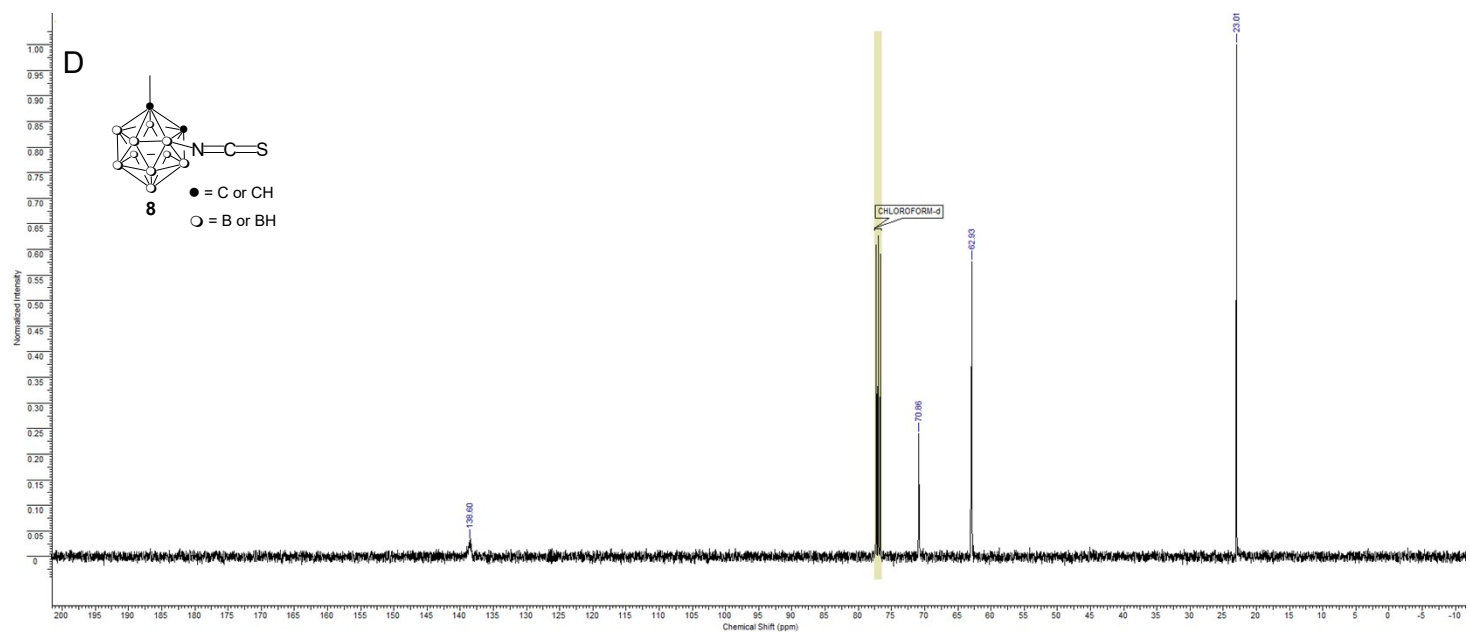

**Figure S2.** The  $^1\text{H}$  (A),  $^{11}\text{B}\{^1\text{H}\}$  (B),  $^{11}\text{B}$  (C), and  $^{13}\text{C}$  (D) spectra of 3-isothiocyanato-1-methyl-*o*-carborane (**8**) in  $\text{CDCl}_3$ .

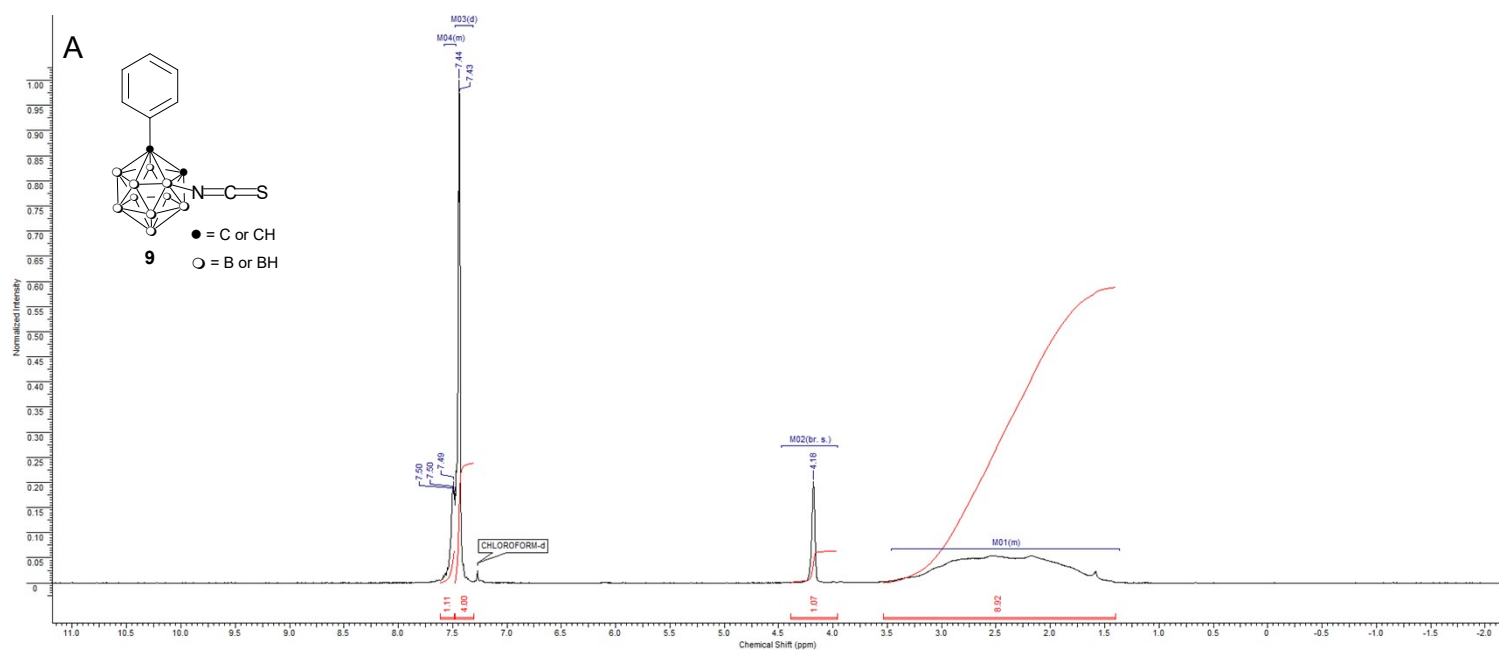

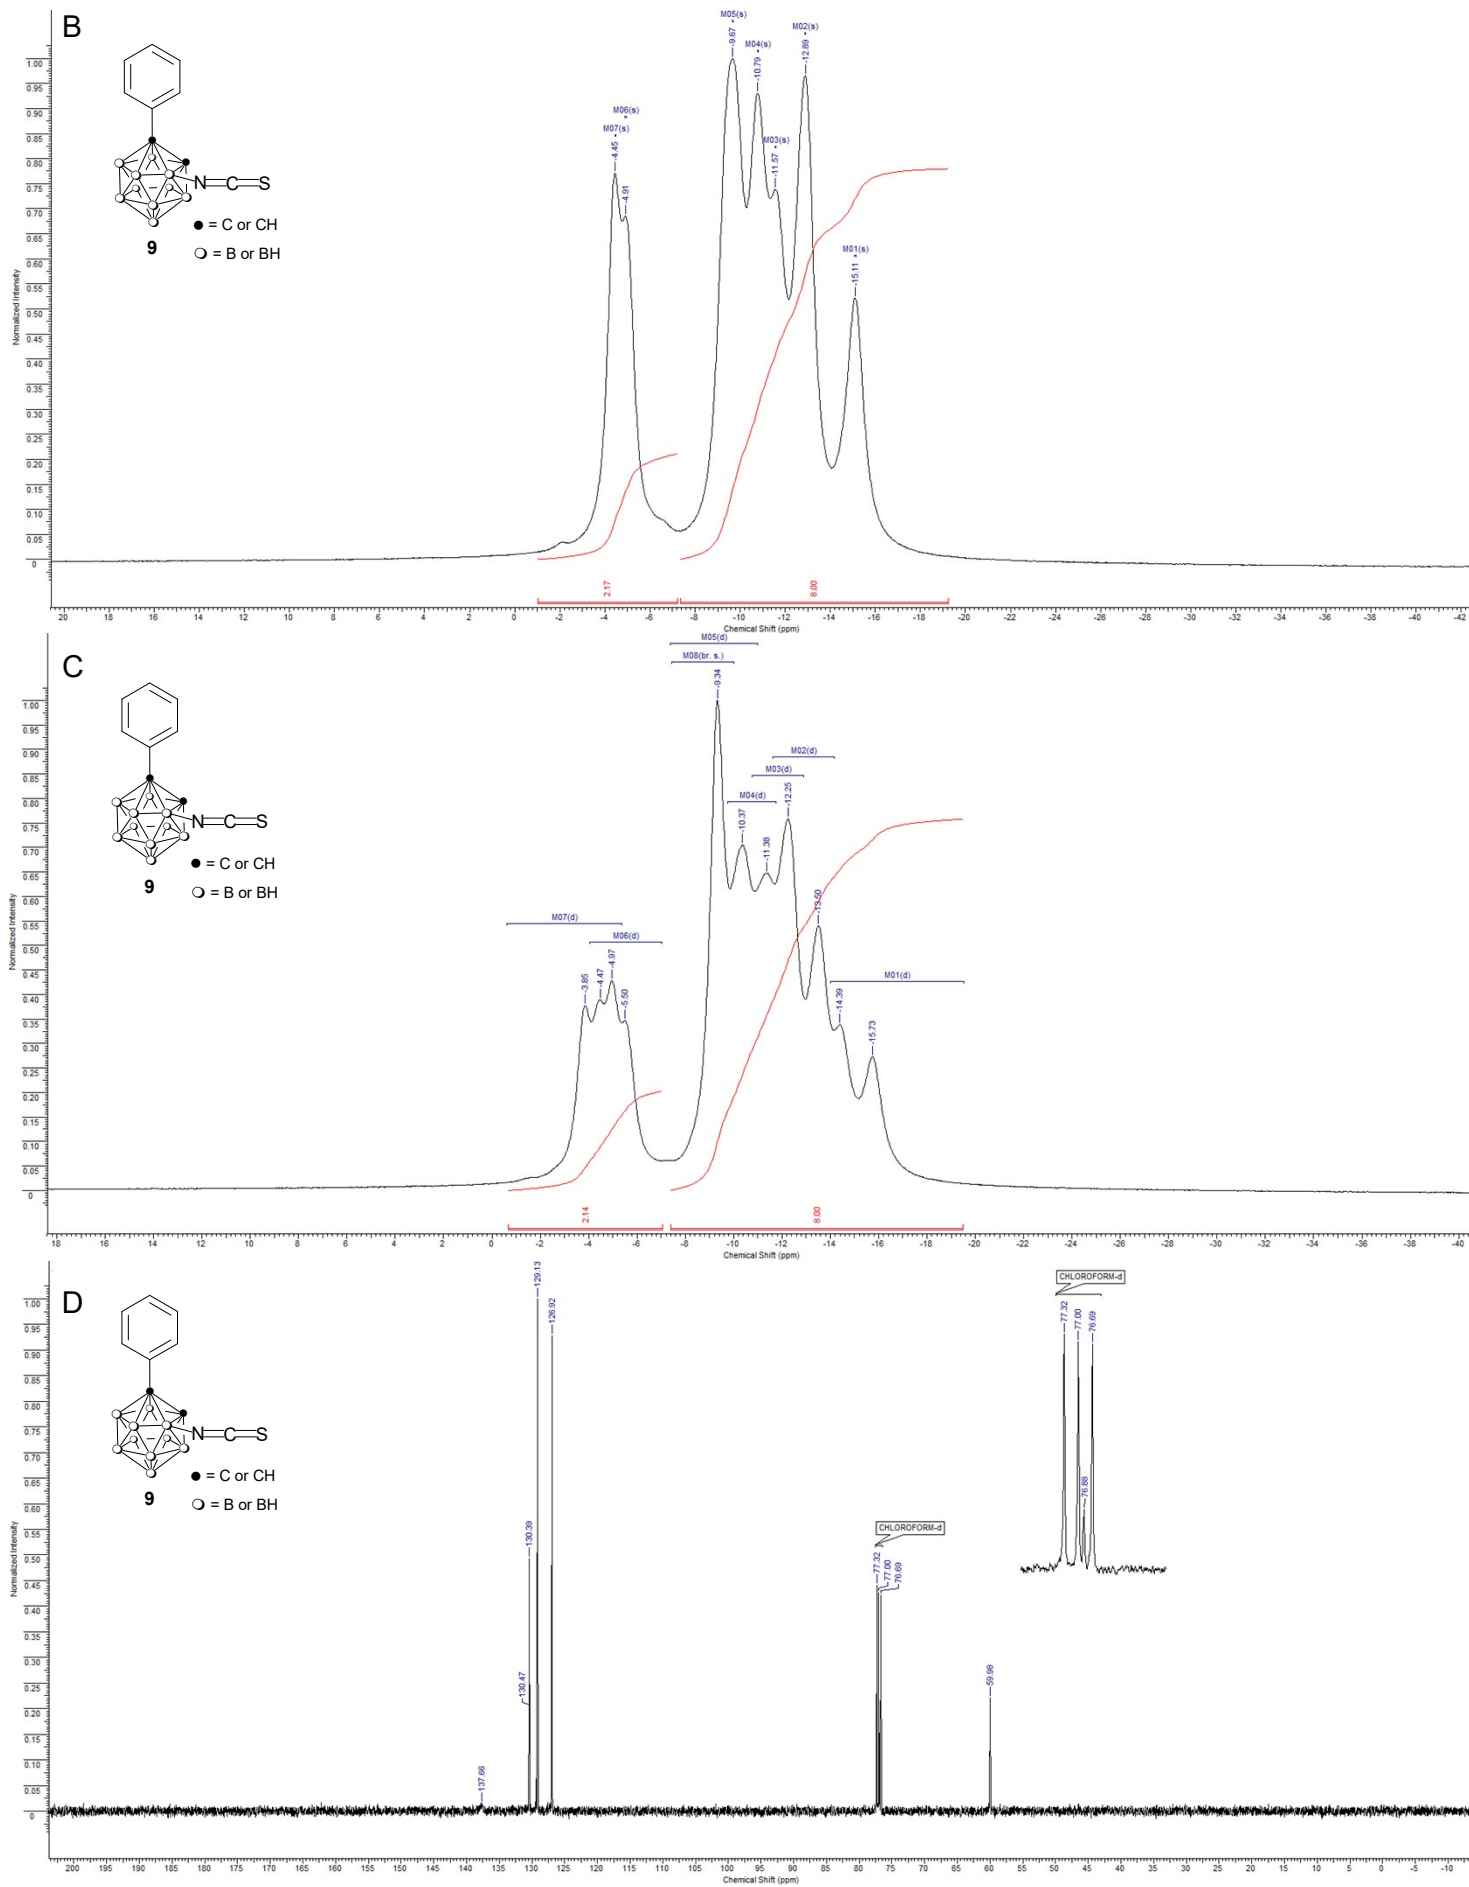

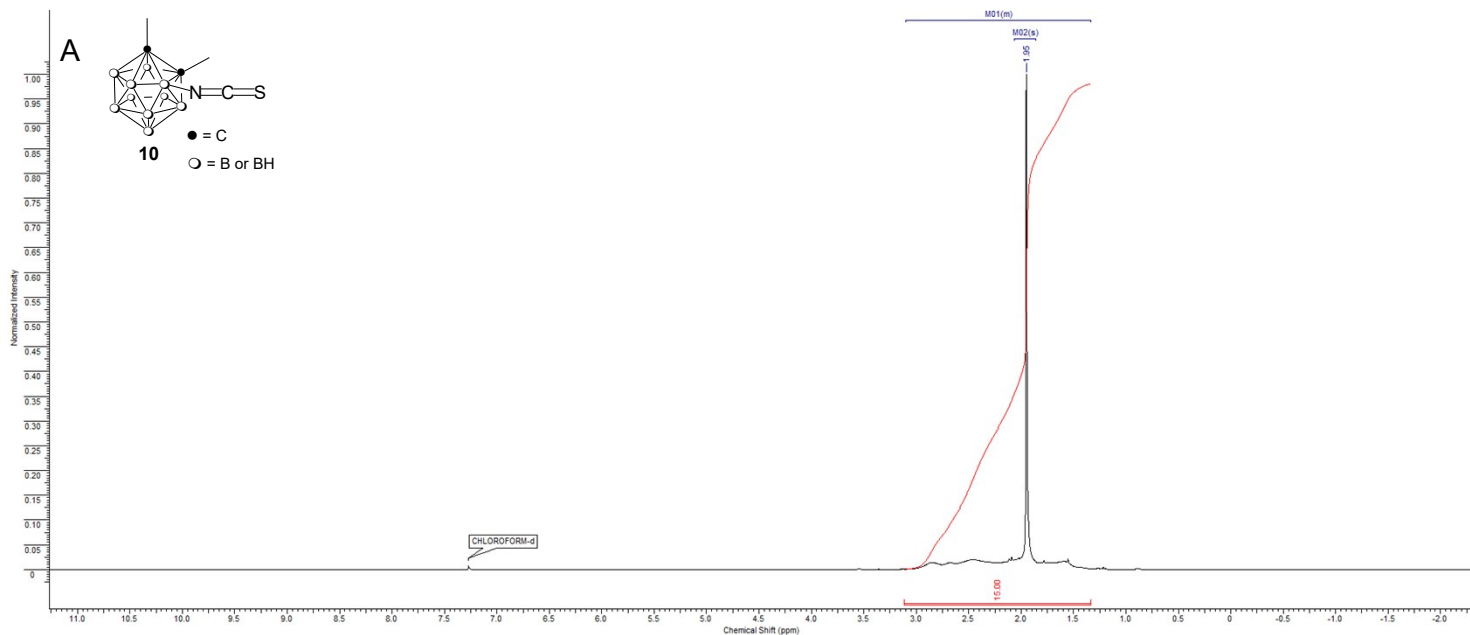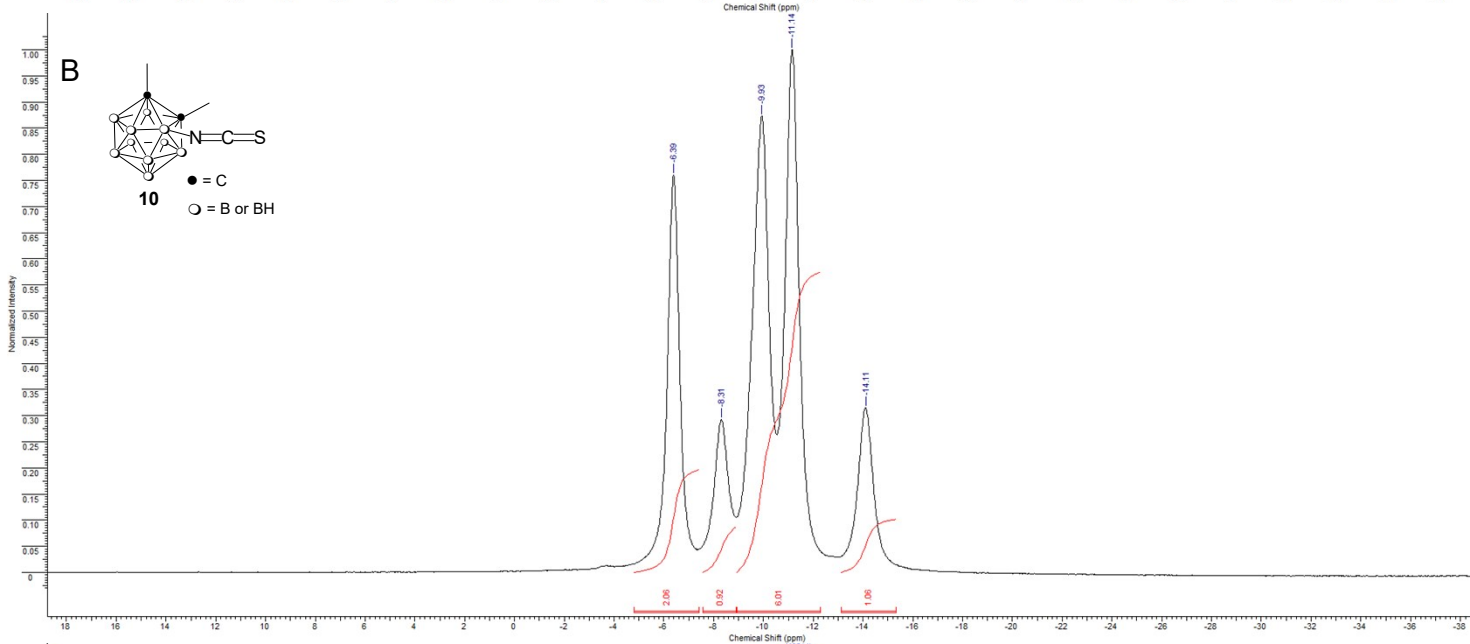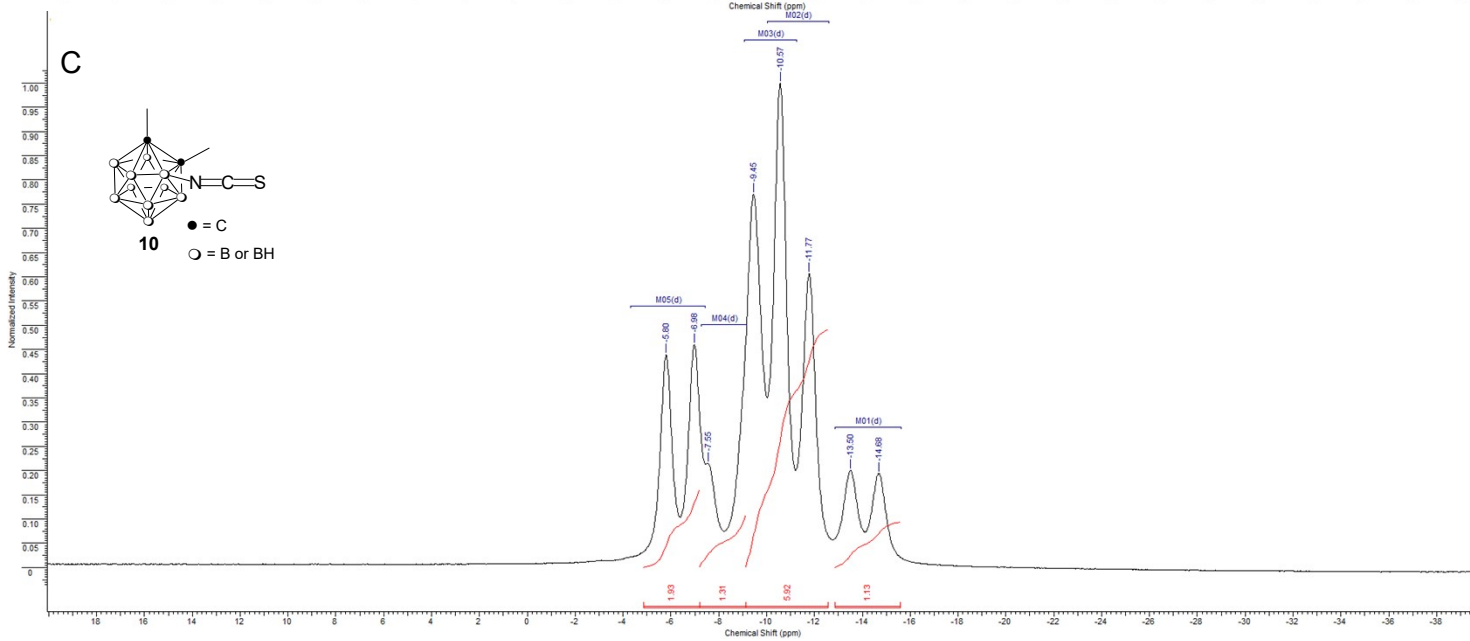

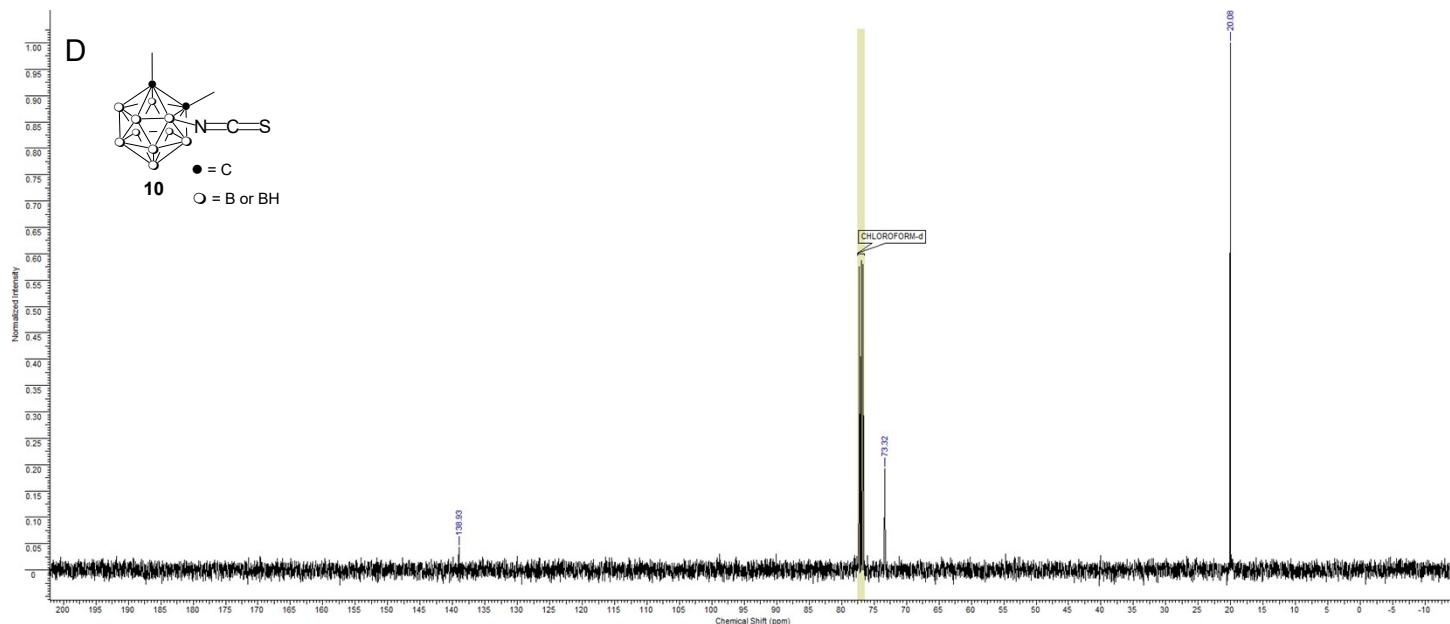

**Figure S4.** The  $^1\text{H}$  (A),  $^{11}\text{B}\{^1\text{H}\}$  (B),  $^{11}\text{B}$  (C), and  $^{13}\text{C}$  (D) spectra of 3-isothiocyanato-1,2-bis(dimethyl)-*o*-carborane (**10**) in  $\text{CDCl}_3$ .

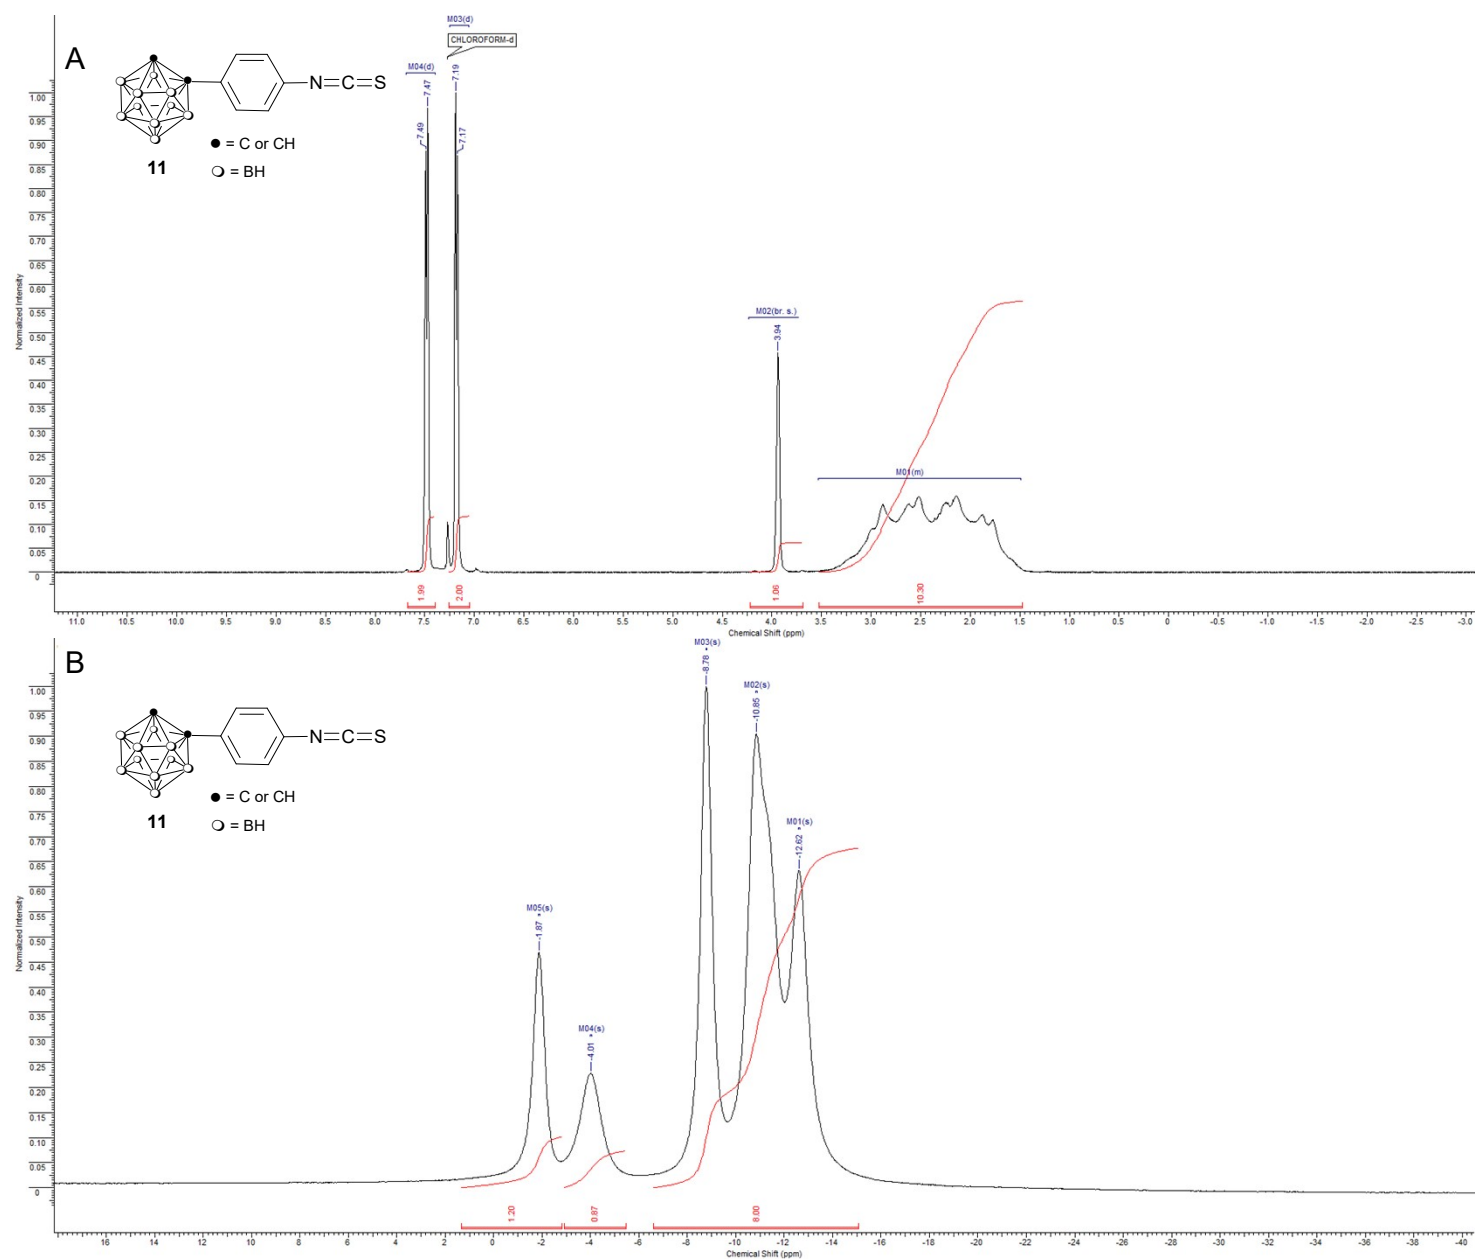

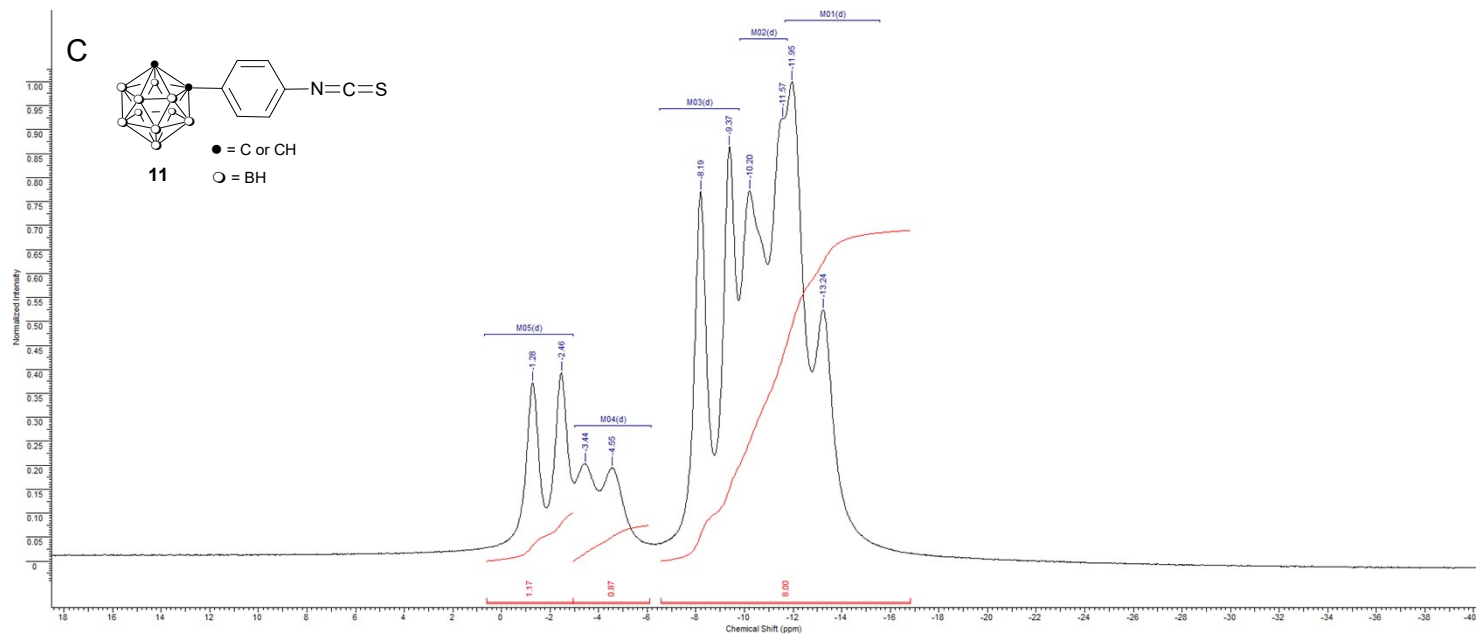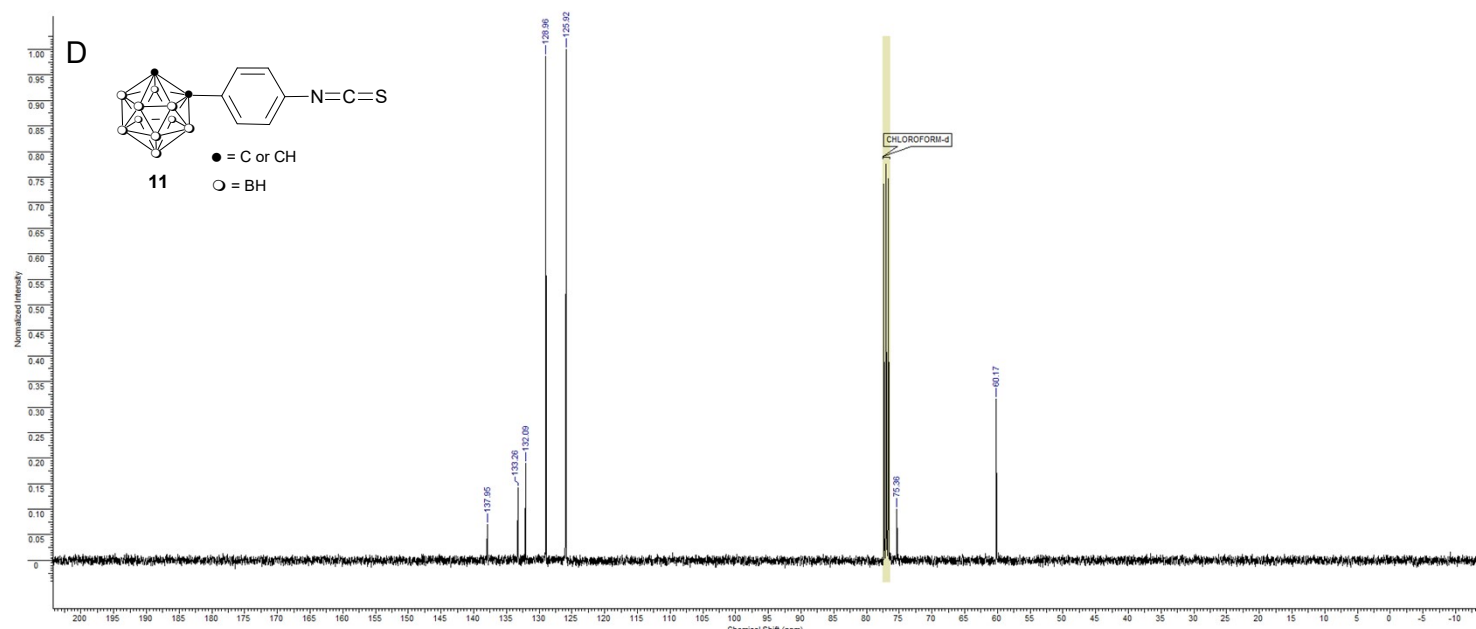

**Figure S5.** The  $^1\text{H}$  (A),  $^{11}\text{B}\{^1\text{H}\}$  (B),  $^{11}\text{B}$  (C), and  $^{13}\text{C}$  (D) spectra of 1-(4'-isothiocyanatophenyl)-*o*-carborane (**11**) in  $\text{CDCl}_3$ .

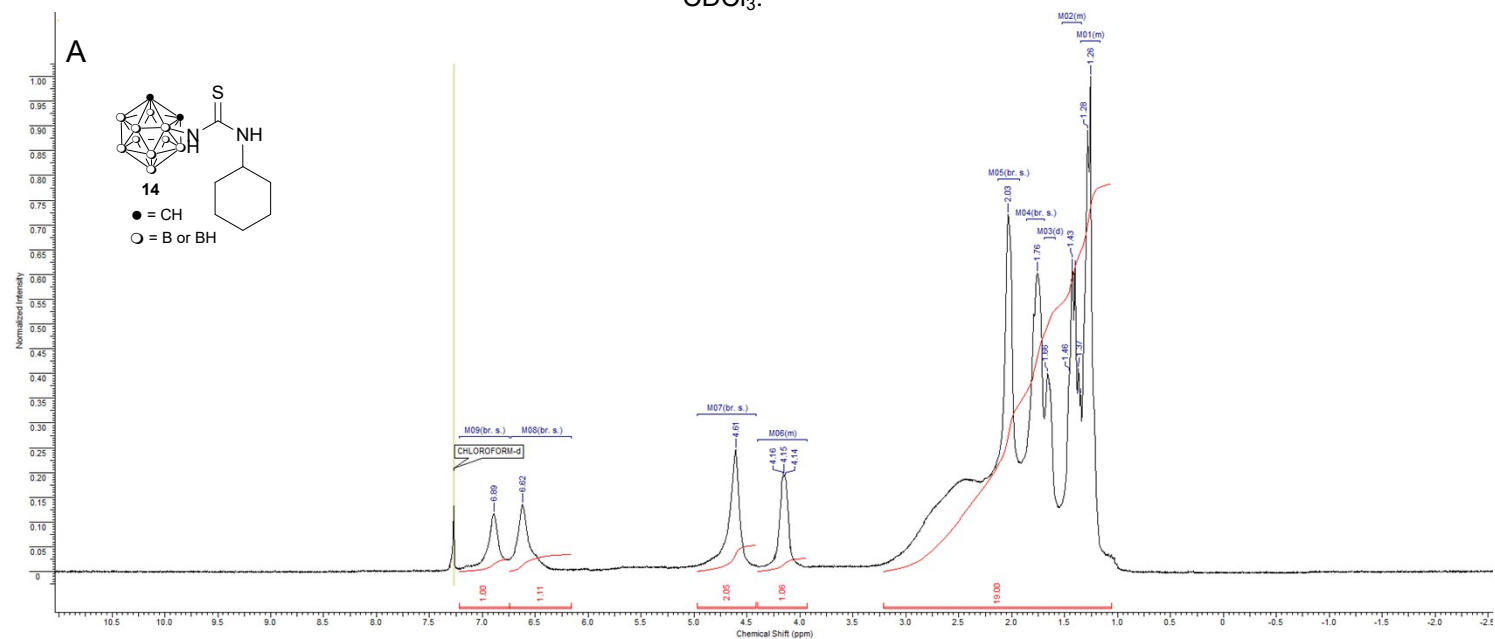

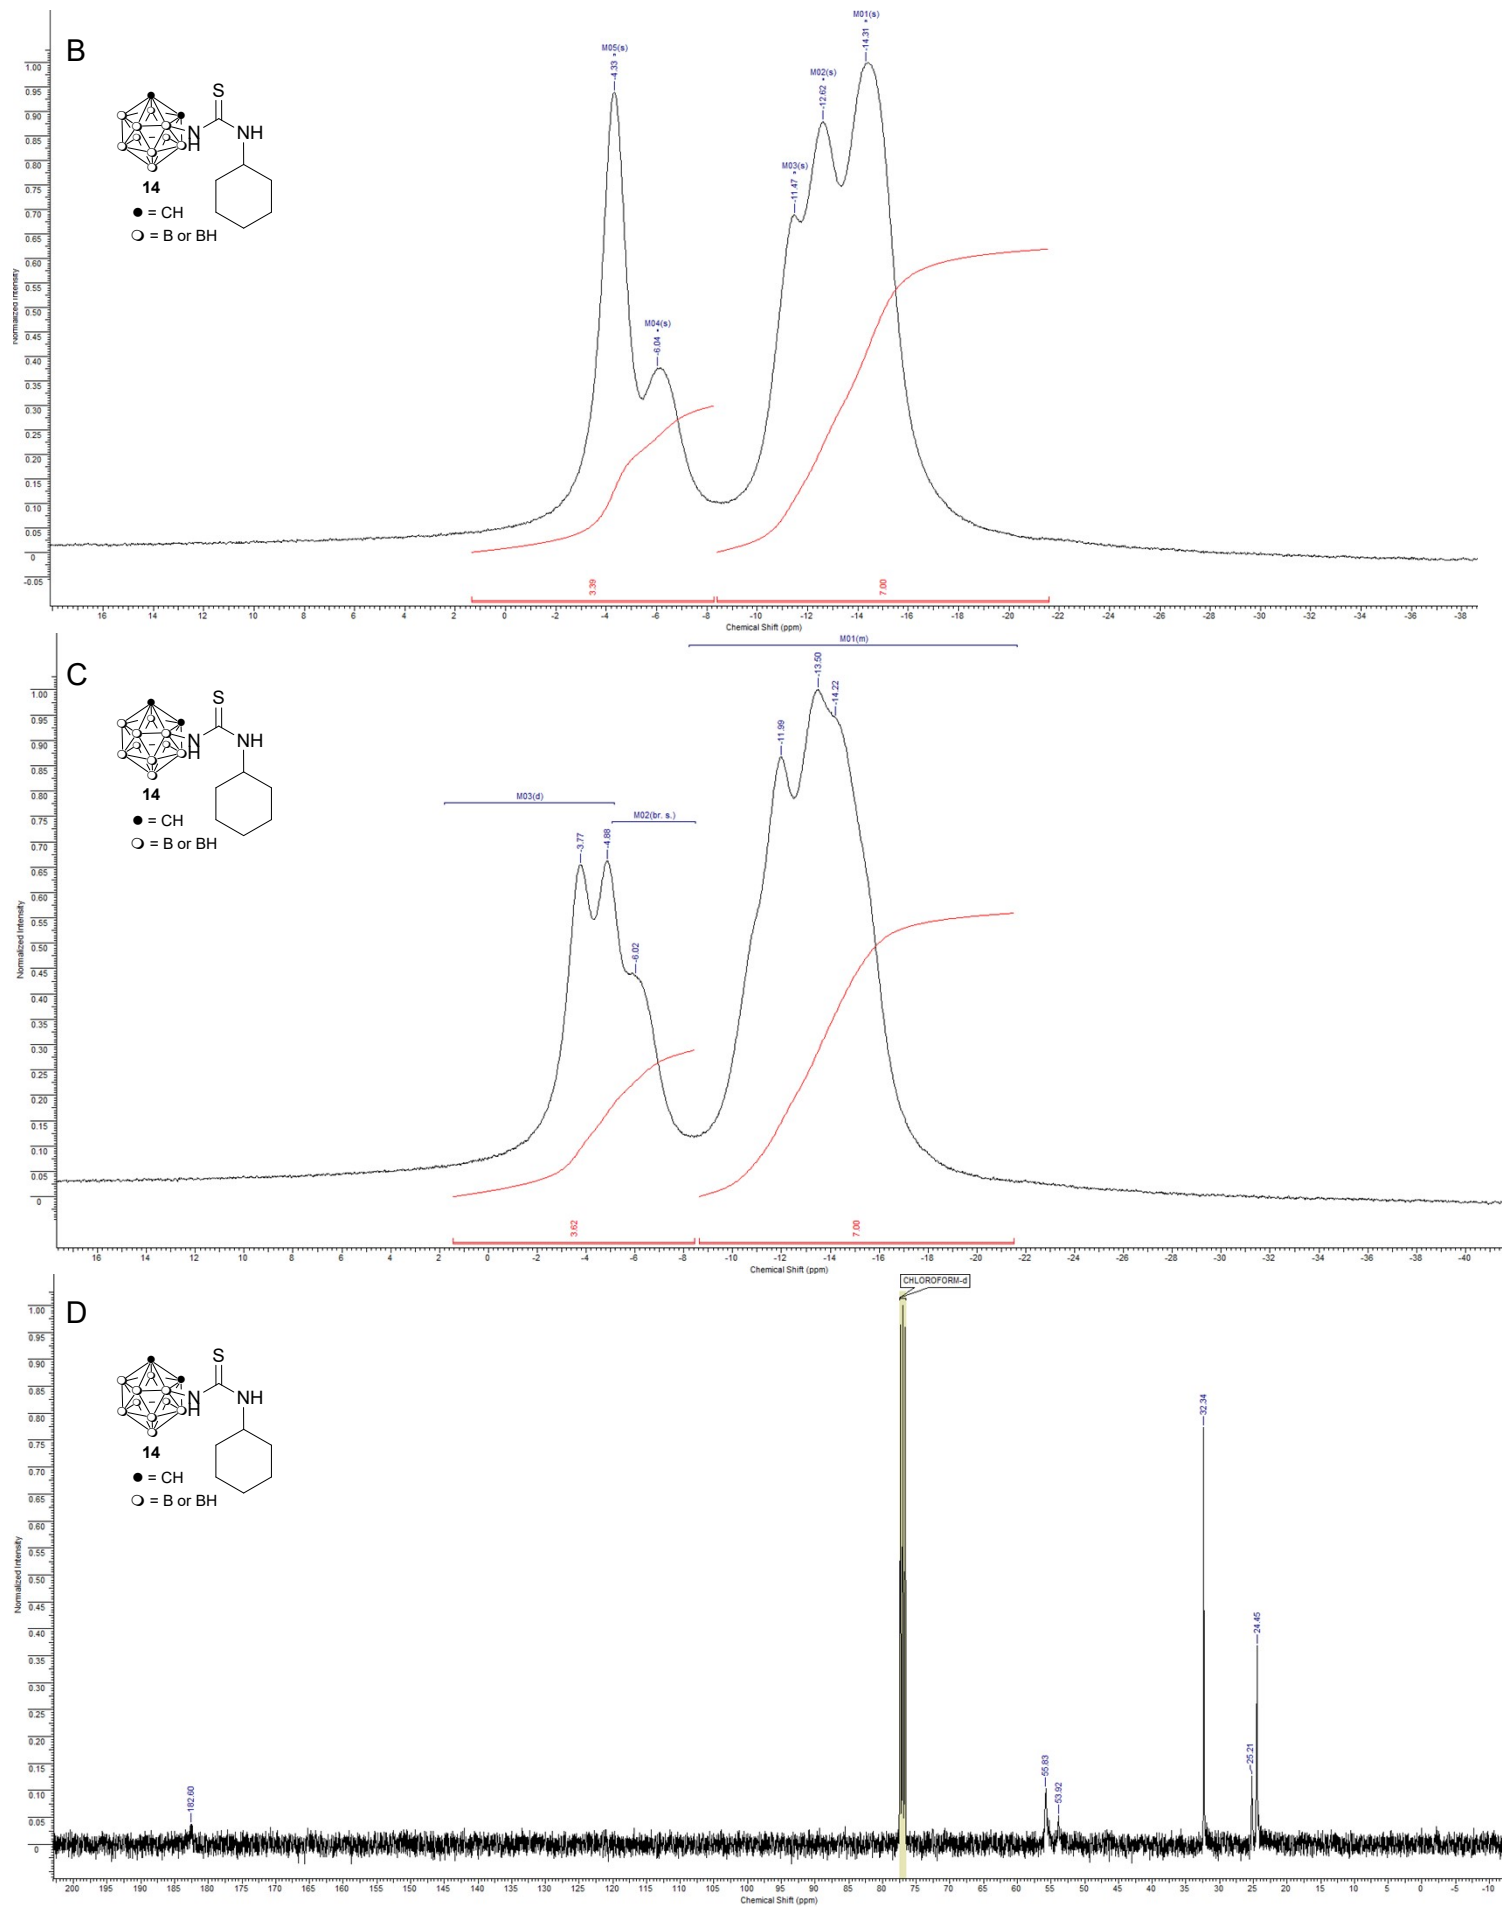

**Figure S6.** The  $^1\text{H}$  (A),  $^{11}\text{B}\{^1\text{H}\}$  (B),  $^{11}\text{B}$  (C), and  $^{13}\text{C}$  (D) spectra of *N*-(*o*-carboran-3-yl)-*N'*-(cyclohexyl)thiourea (**14**) in  $\text{CDCl}_3$ .

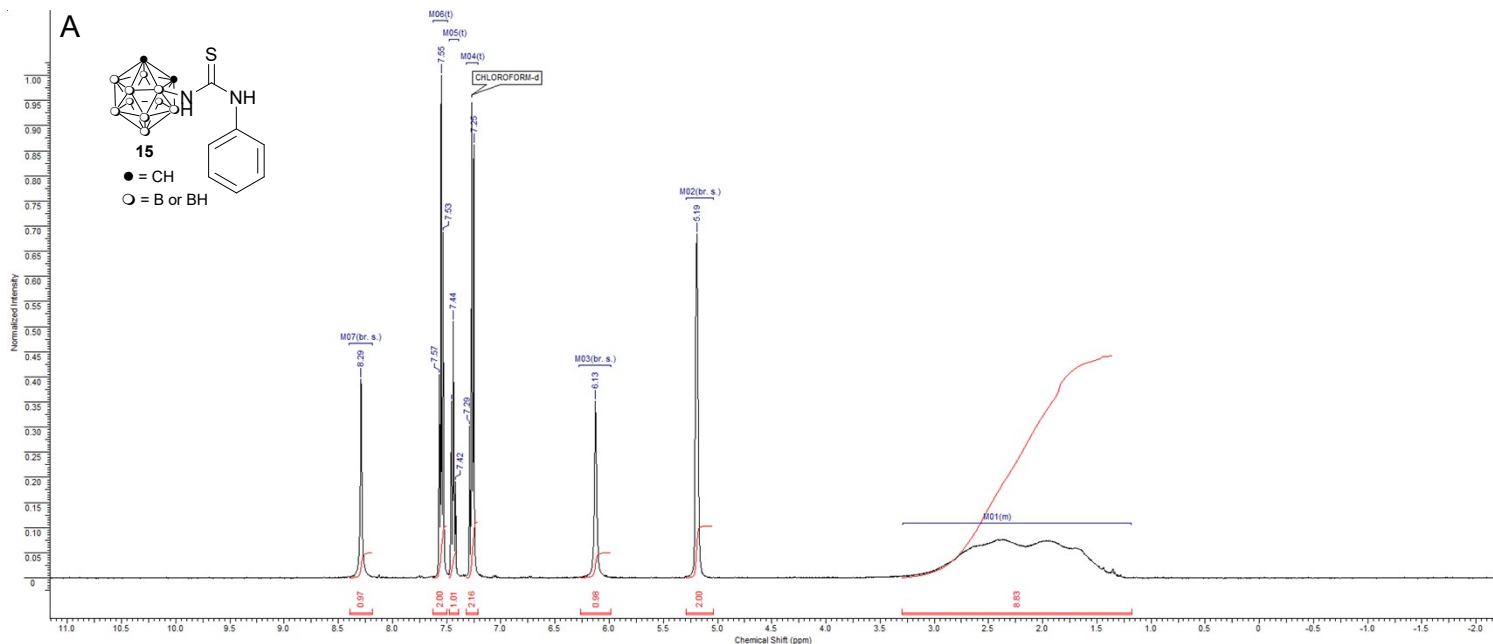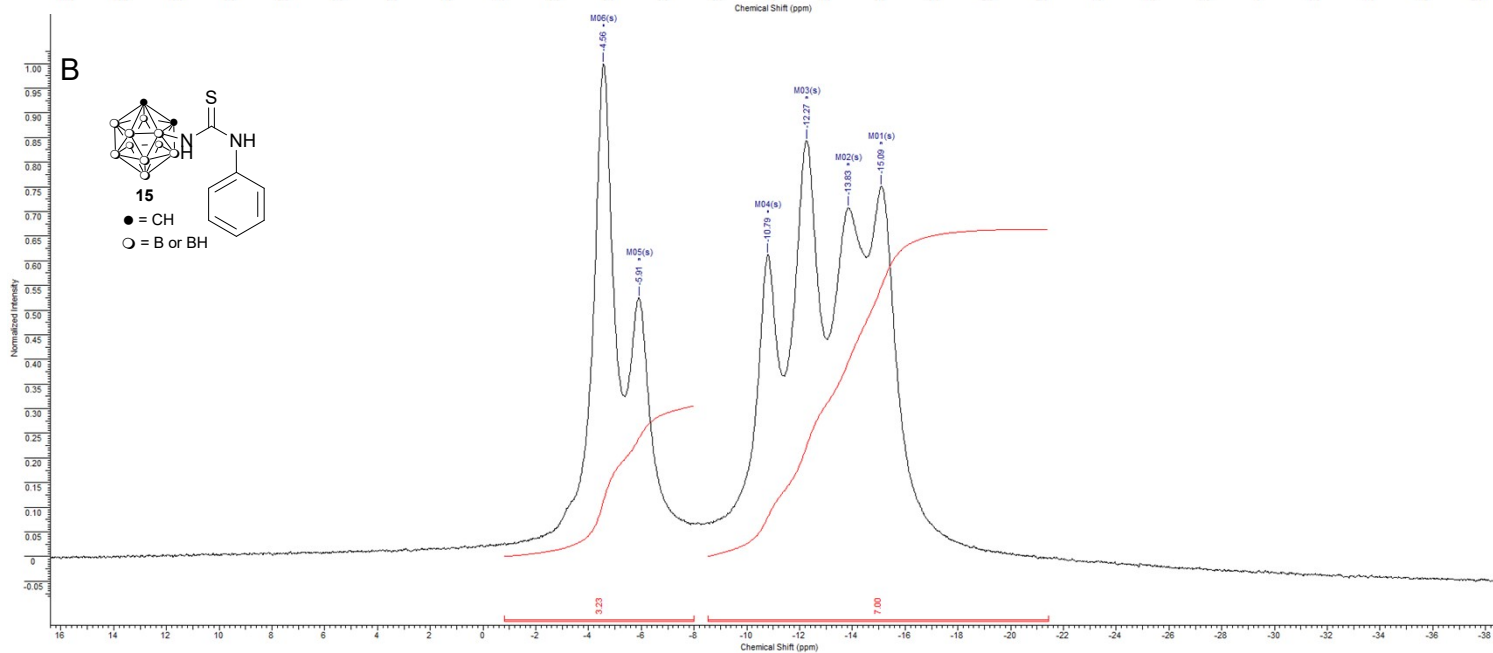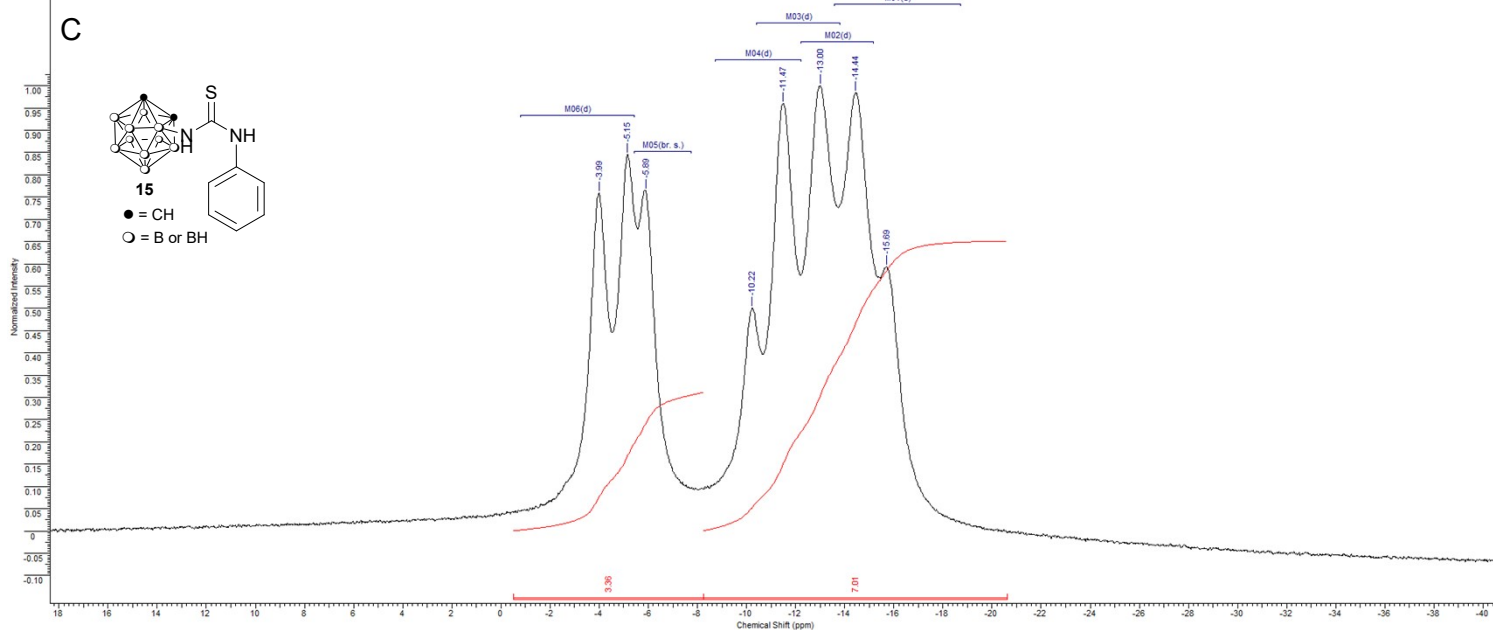

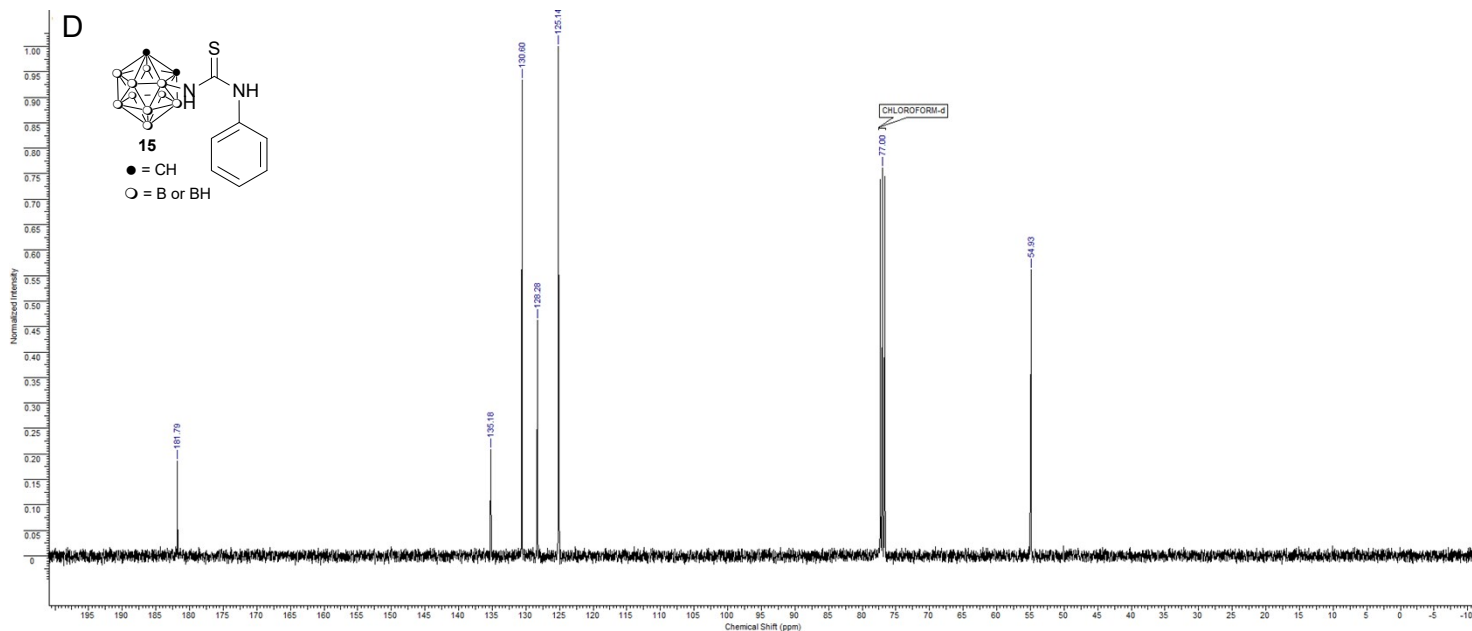

**Figure S7.** The  $^1\text{H}$  (A),  $^{11}\text{B}\{^1\text{H}\}$  (B),  $^{11}\text{B}$  (C), and  $^{13}\text{C}$  (D) spectra of *N*-(*o*-carboran-3-yl)-*N'*-(phenyl)thiourea (**15**) in  $\text{CDCl}_3$ .

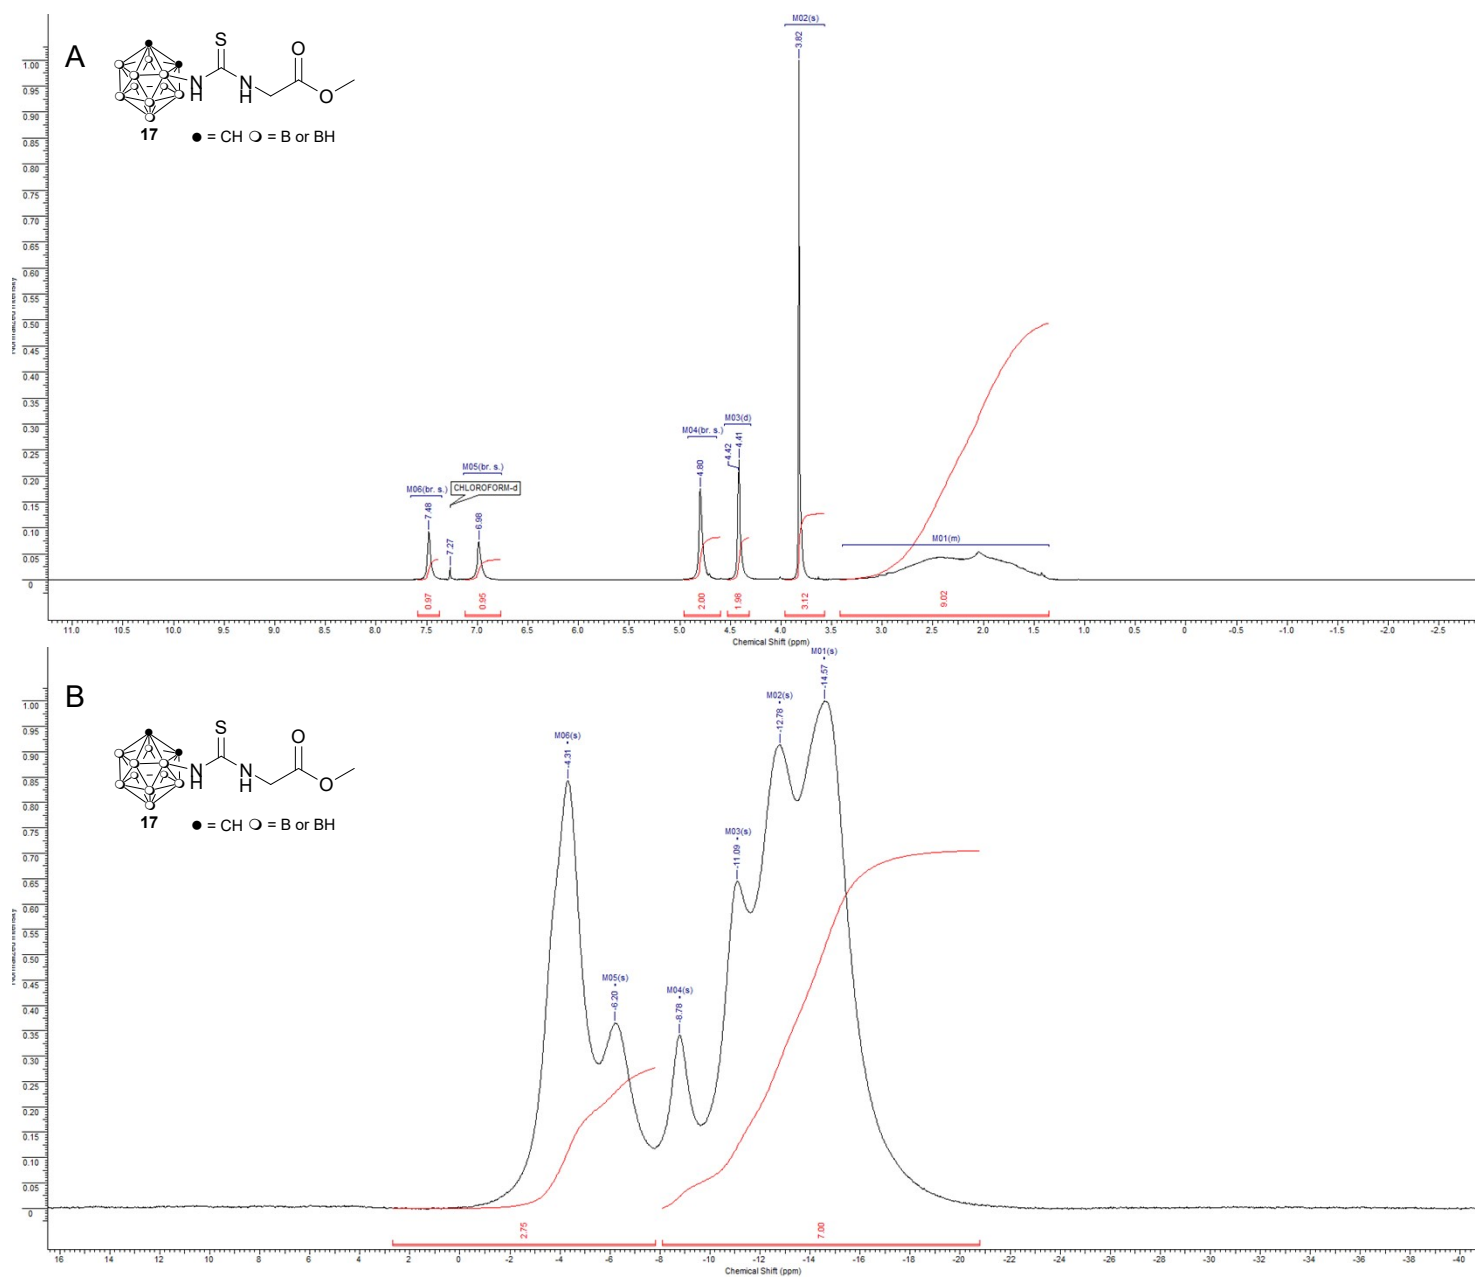

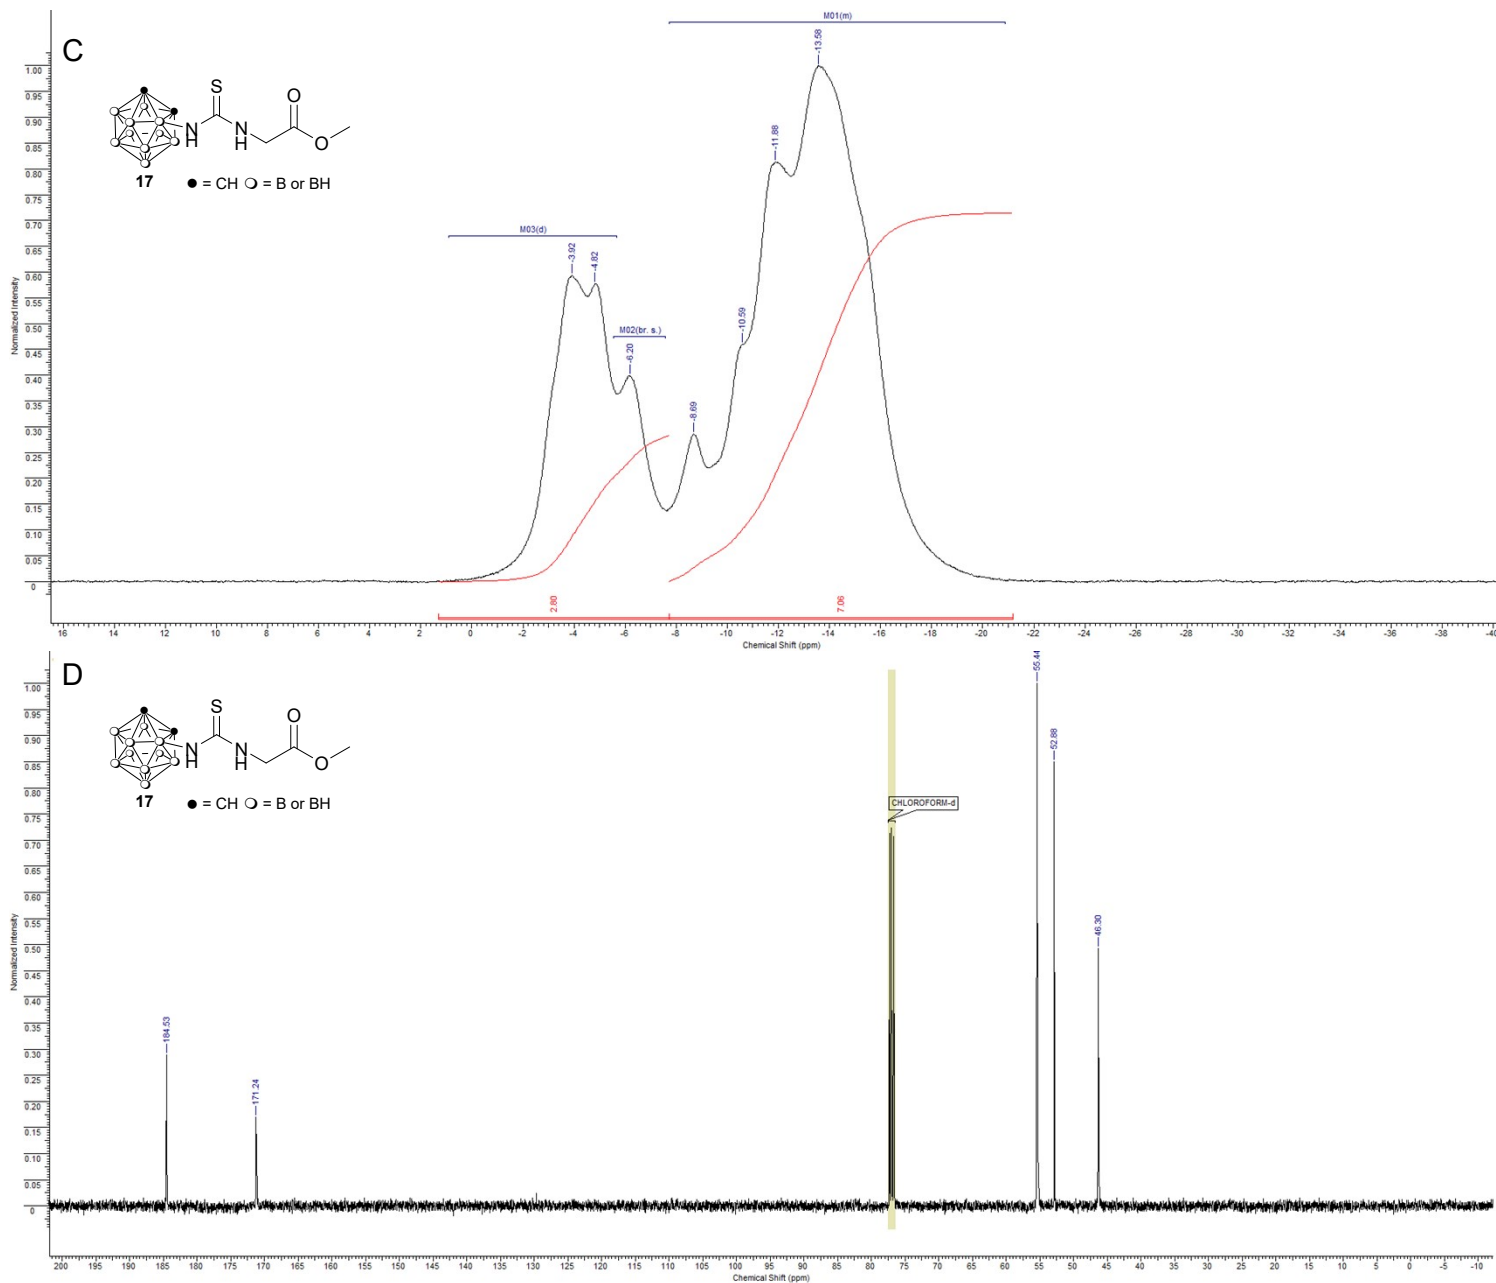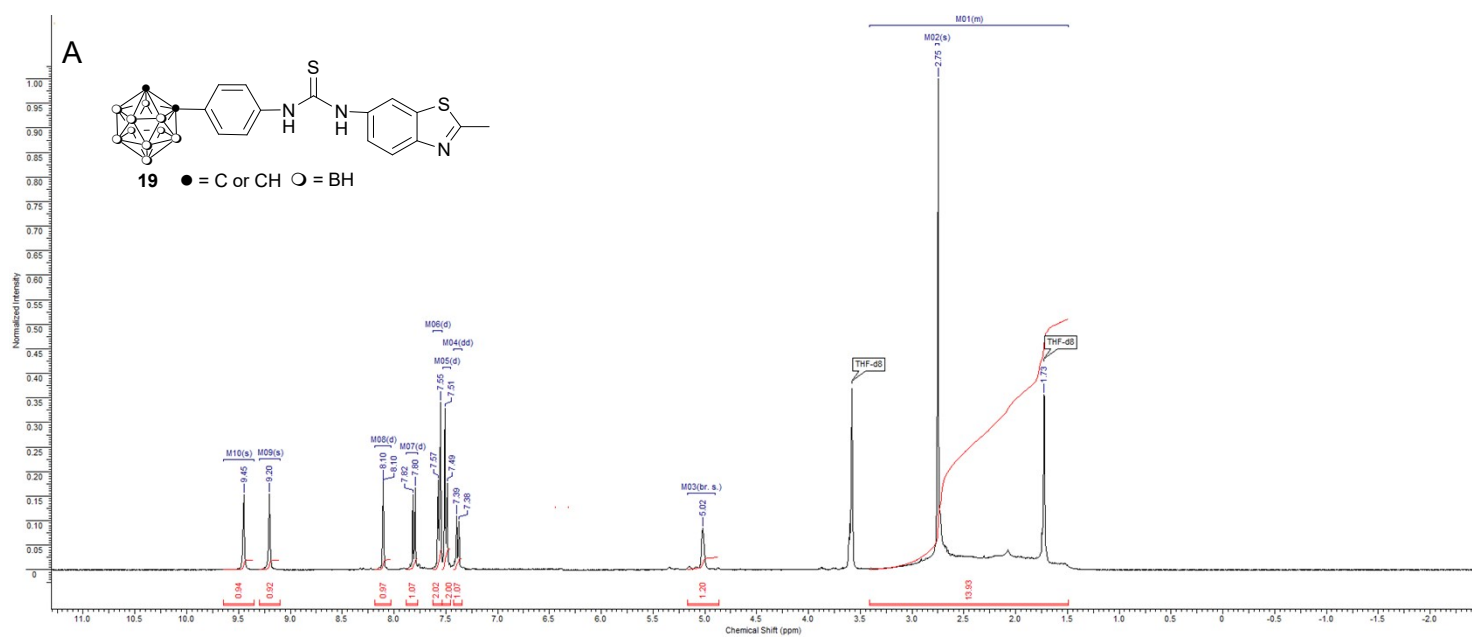

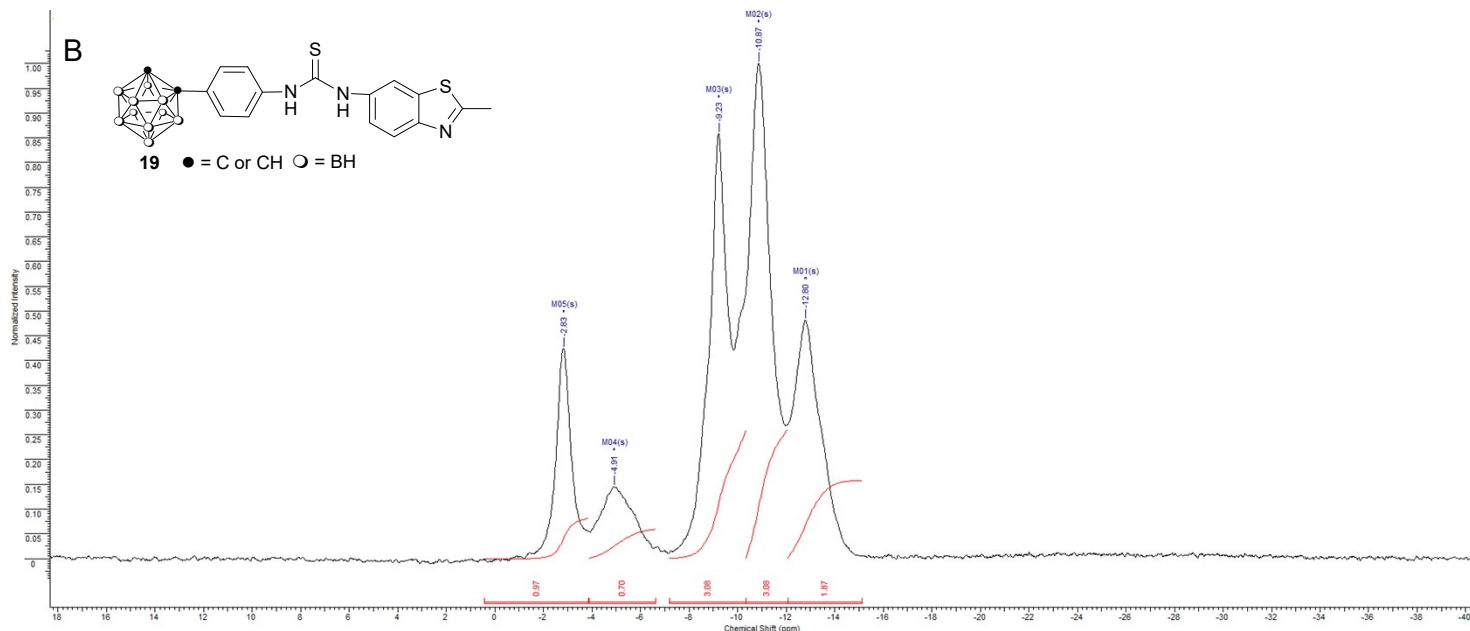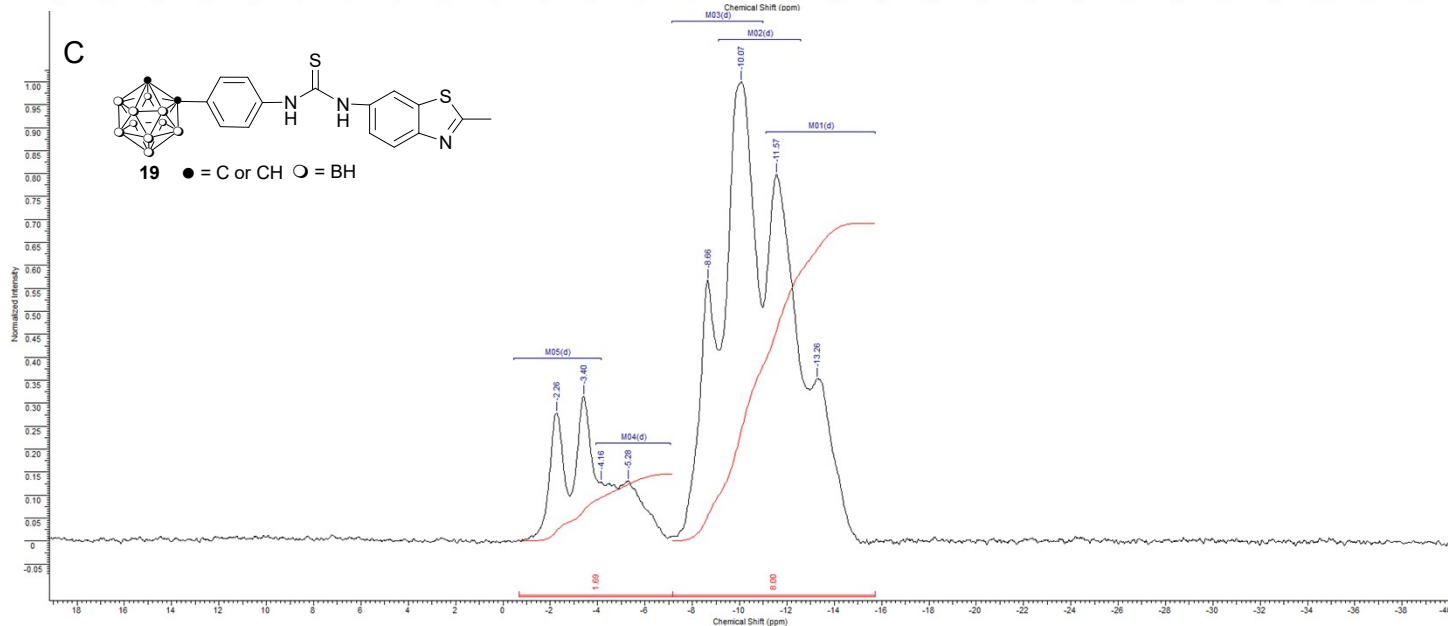

**Figure S9.** The  $^1\text{H}$  (A),  $^{11}\text{B}\{^1\text{H}\}$  (B) and  $^{11}\text{B}$  (C) spectra of *N*-[4-(*o*-carboran-1-yl)phenyl]-*N'*-(2-methylbenzo[*d*]thiazol-6-yl)thiourea (**19**) in  $\text{THF-}d_8$ .

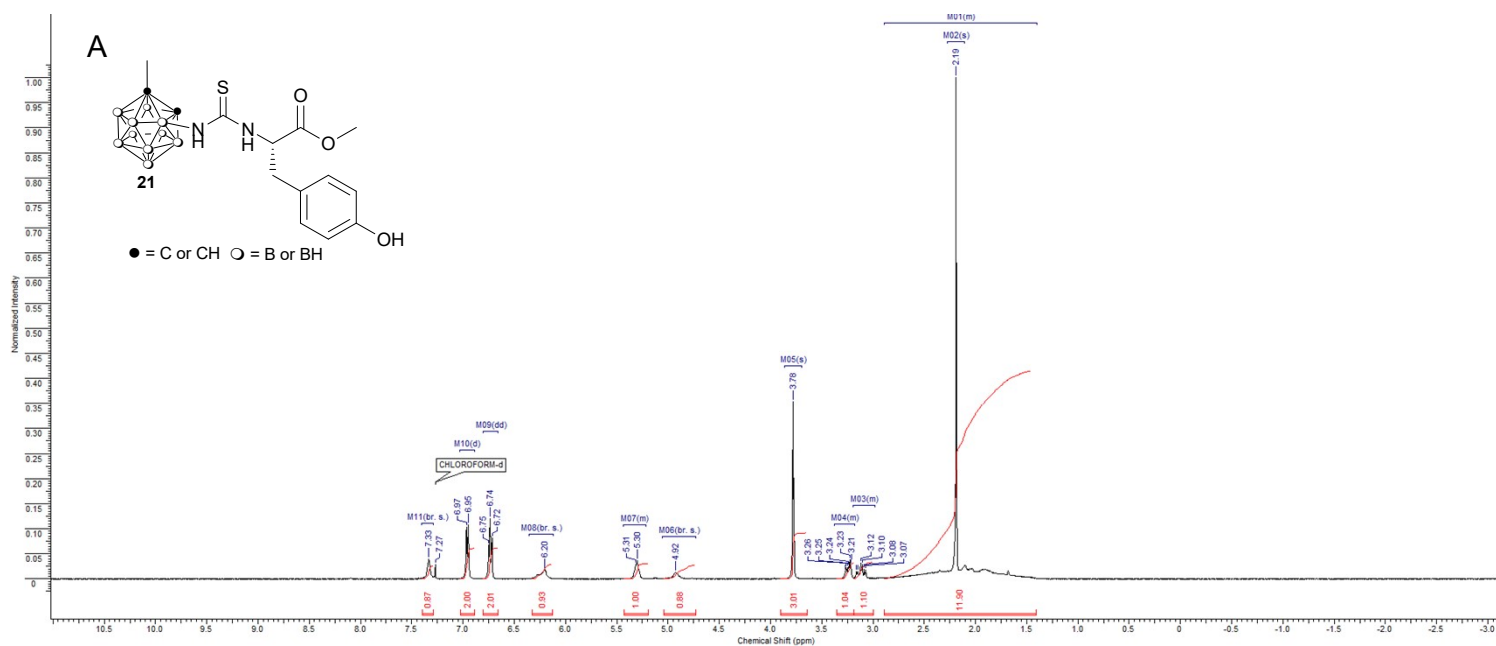

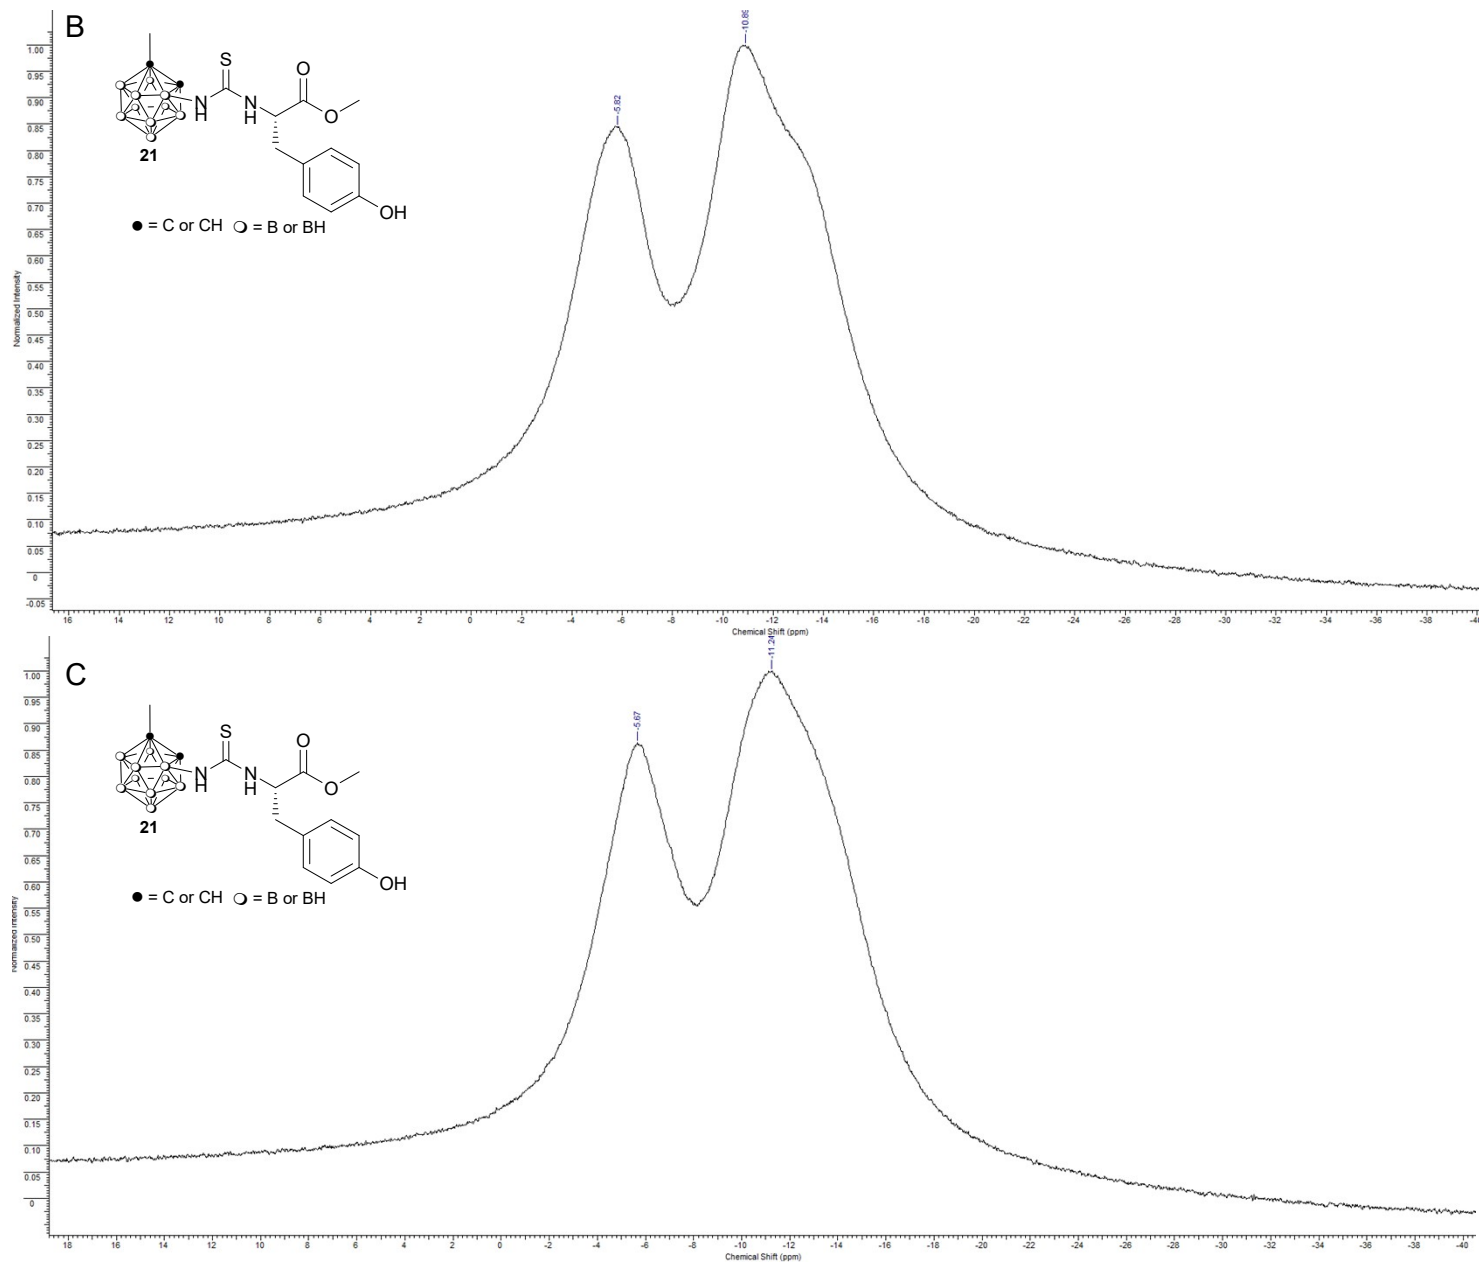

**Figure S10.** The  $^1\text{H}$  (A),  $^{11}\text{B}\{^1\text{H}\}$  (B) and  $^{11}\text{B}$  (C) spectra of methyl ester of 2-[*N'*-(1-methyl-*o*-carboran-3-yl)thioureido]-3-(4-hydroxyphenyl)propanoic acid (**21**) in  $\text{CDCl}_3$ .

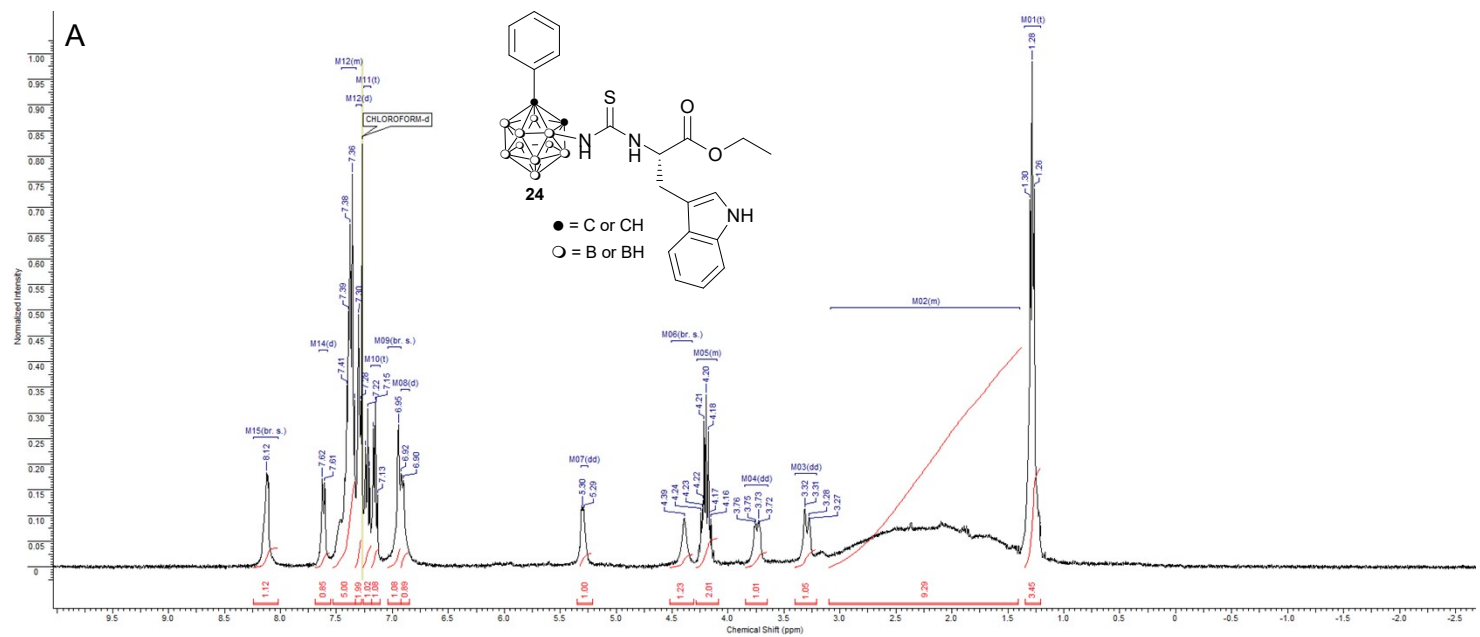

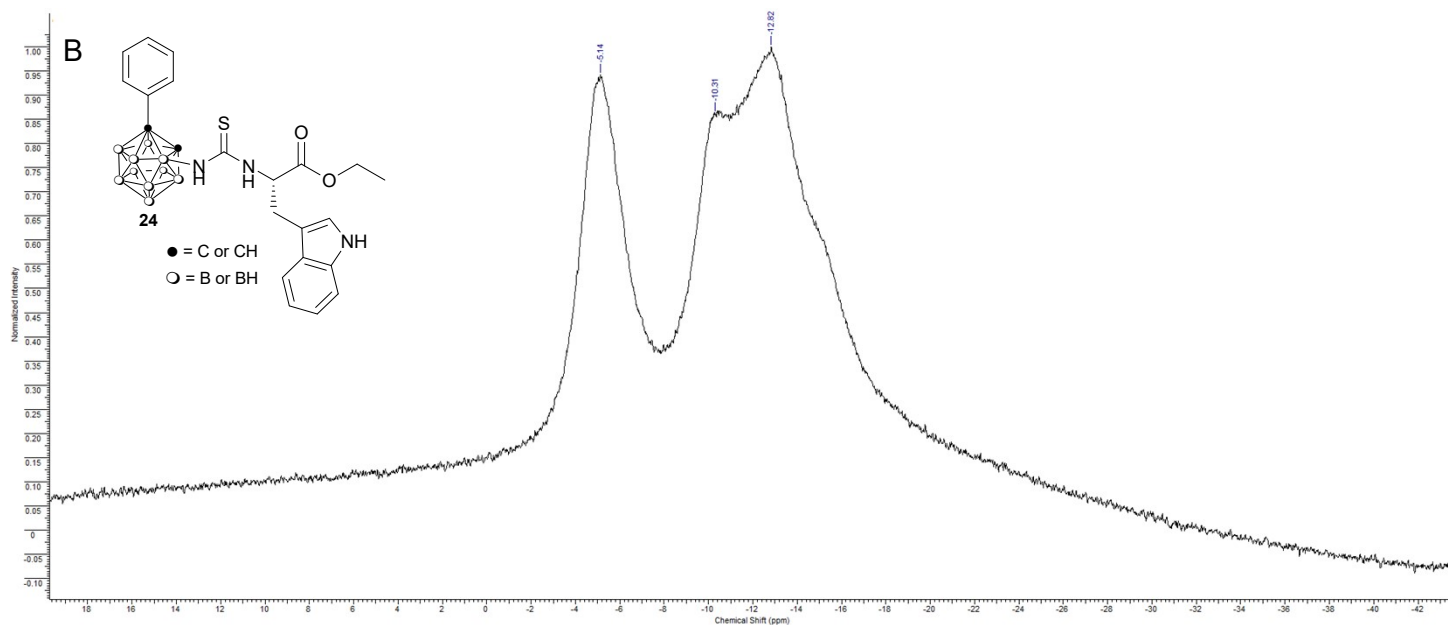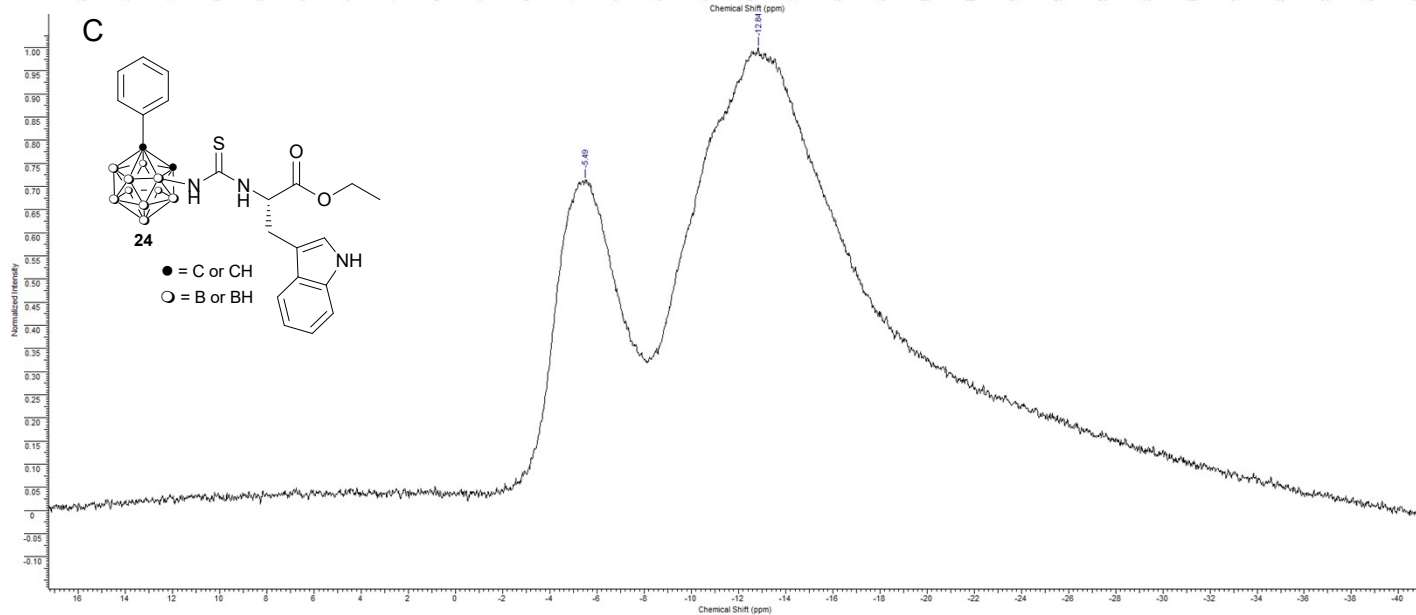

**Figure S11.**  $^1\text{H}$  (A),  $^{11}\text{B}\{^1\text{H}\}$  (B) and  $^{11}\text{B}$  (C) spectra of ethyl ester of 2-[*N'*-(1-phenyl-*o*-carboran-3-yl)thioureido]-3-(1*H*-indol-3-yl)propanoic acid (**24**) in  $\text{CDCl}_3$ .

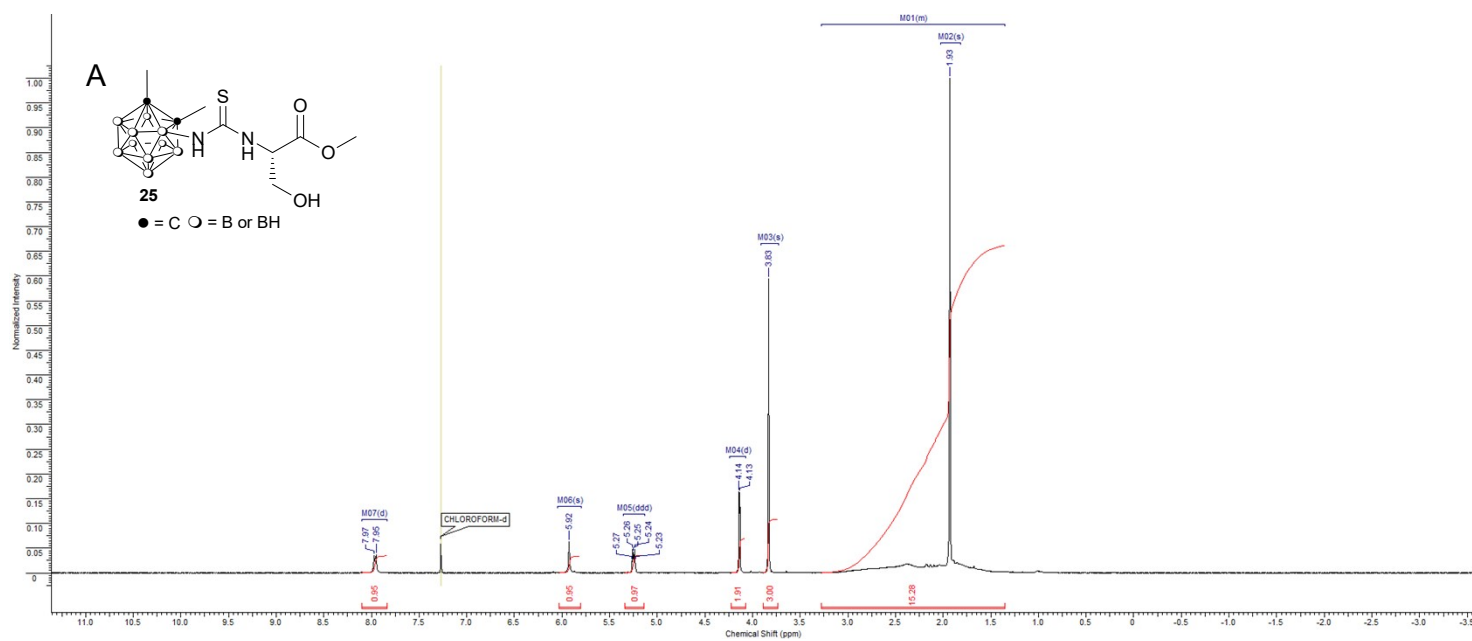

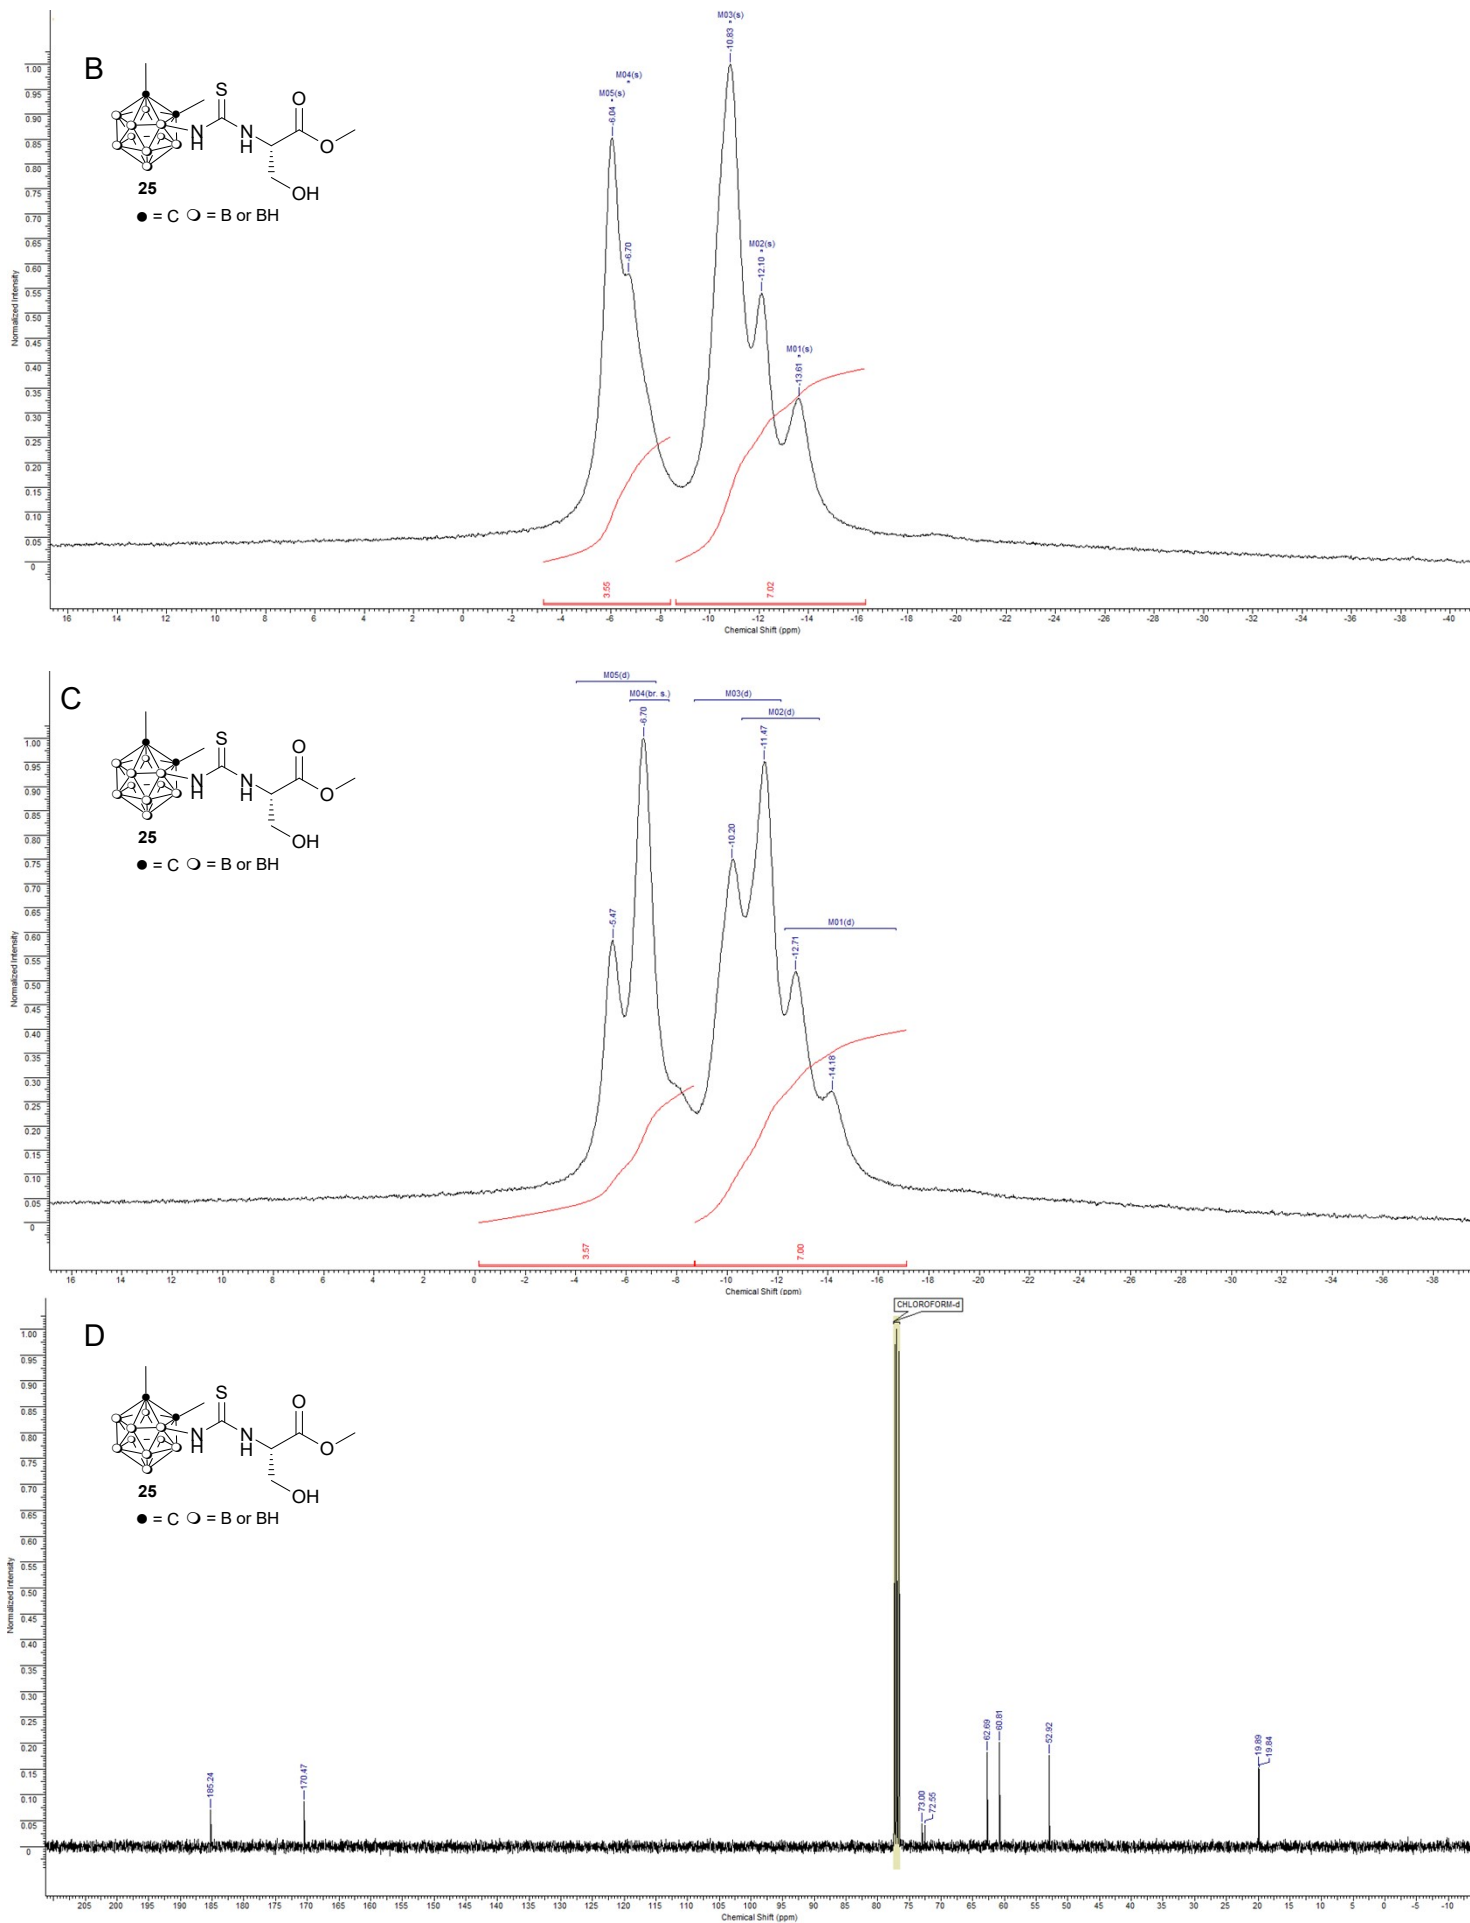

**Figure S12.** The  $^1\text{H}$  (A),  $^{11}\text{B}\{^1\text{H}\}$  (B) and  $^{11}\text{B}$  (C) spectra of methyl ester of 2- $\{N$ -[1,2-bis(dimethyl)-*o*-carboran-3-yl]thioureido}-3-hydroxypropanoic acid (**25**) in  $\text{CDCl}_3$ .
